# Supplementary material
Source: publisher site journal article supplement (https://www.dovepress.com/article/113211)
Supplement: Supplementary file 1 [file get_supplementary_file.php]

## Appendix

### Nationwide trends in glucose-lowering drug use in Denmark, 1999-2014

Diana Hedevang Christensen<sup>1</sup>

Jørgen Rungby<sup>2,3</sup>

Reimar Wernich Thomsen<sup>1</sup>

<sup>1</sup>*Department of Clinical Epidemiology, Aarhus University Hospital, Aarhus, Denmark*

<sup>2</sup>*Department of Pharmacology, University of Aarhus, Aarhus, Denmark*

<sup>3</sup>*Department of Endocrinology, Gentofte University Hospital, Copenhagen, Denmark*

**Table S1:** Annual prevalence of glucose-lowering drug users in Denmark (per 1,000 inhabitants), 1999-2014, **women.**

**Table S2:** Annual prevalence of insulin users in Denmark (per 1,000 inhabitants), 1999-2014, **women.**

**Table S3:** Annual prevalence of glucose-lowering drug users in Denmark (per 1,000 inhabitants), 1999-2014, **men.**

**Table S4:** Annual prevalence of insulin users in Denmark (per 1,000 inhabitants), 1999-2014, **men.**

**Table S5:** Annual prevalence of glucose-lowering drug users in Denmark (per 1,000 inhabitants), 1999-2014, **age-group <20 years.**

**Table S6:** Annual prevalence of glucose-lowering drug users in Denmark (per 1,000 inhabitants), 1999-2014, **age-group 20-39 years.**

**Table S7:** Annual prevalence of glucose-lowering drug users in Denmark (per 1,000 inhabitants), 1999-2014, **age-group 40-64 years.**

**Table S8:** Annual prevalence of glucose-lowering drug users in Denmark (per 1,000 inhabitants), 1999-2014, **age-group 65-79 years.**

**Table S9:** Annual prevalence of glucose-lowering drug users in Denmark (per 1,000 inhabitants), 1999-2014, **age-group ≥ 80 years.**

**Table S10:** Annual prevalence of insulin users in Denmark (per 1,000 inhabitants), 1999-2014, **age-group <20 years.**

**Table S11:** Annual prevalence of insulin users in Denmark (per 1,000 inhabitants), 1999-2014, **age-group 20-39 years.**

**Table S12:** Annual prevalence of insulin users in Denmark (per 1,000 inhabitants), 1999-2014, **age-group 40-64 years.**

**Table S13:** Annual prevalence of insulin users in Denmark (per 1,000 inhabitants), 1999-2014, **age-group 65-79 years.**

**Table S14:** Annual prevalence of insulin users in Denmark (per 1,000 inhabitants), 1999-2014, **age-group ≥ 80 years.**

**Figure S1:** Annual prevalence of all glucose-lowering drug-users (a) and insulin users (b) in Denmark per 1,000 inhabitants, 1999-2014, **women.**

**Figure S2:** Annual prevalence of all glucose-lowering drug-users (a) and insulin users (b) in Denmark per 1,000 inhabitants, 1999-2014, **men.**

**Figure S3:** Annual prevalence of all glucose-lowering drug-users (a) and insulin users (b) in Denmark per 1,000 inhabitants, 1999-2014, **age-group < 20 years.**

**Figure S4:** Annual prevalence of all glucose-lowering drug-users (a) and insulin users (b) in Denmark per 1,000 inhabitants, 1999-2014, **age-group 20-39 years.**

**Figure S5:** Annual prevalence of all glucose-lowering drug-users (a) and insulin users (b) in Denmark per 1,000 inhabitants, 1999-2014, **age-group 40-64 years.**

**Figure S6:** Annual prevalence of all glucose-lowering drug-users (a) and insulin users (b) in Denmark per 1,000 inhabitants, 1999-2014, **age-group 65-79 years.**

**Figure S7:** Annual prevalence of all glucose-lowering drug-users (a) and insulin users (b) in Denmark per 1,000 inhabitants, 1999-2014, **age-group ≥ 80 years.**

| <b>Table S1: Annual prevalence of glucose-lowering drug users in Denmark (per 1,000 inhabitants), 1999-2014, women</b> |                                 |                   |                   |                   |                   |                   |                   |                   |                   |                   |                   |                   |                   |                   |                    |                                  |
|------------------------------------------------------------------------------------------------------------------------|---------------------------------|-------------------|-------------------|-------------------|-------------------|-------------------|-------------------|-------------------|-------------------|-------------------|-------------------|-------------------|-------------------|-------------------|--------------------|----------------------------------|
|                                                                                                                        | 1999                            | 2000              | 2001              | 2002              | 2003              | 2004              | 2005              | 2006              | 2007              | 2008              | 2009              | 2010              | 2011              | 2012              | 2013               | 2014                             |
| TOTAL                                                                                                                  | 45,056<br>(16.76)<br><i>100</i> | 47,377<br>(17.57) | 49,787<br>(18.41) | 52,418<br>(19.31) | 56,105<br>(20.62) | 60,430<br>(22.16) | 64,994<br>(23.77) | 69,297<br>(25.28) | 73,845<br>(26.85) | 78,448<br>(28.39) | 82,973<br>(29.85) | 88,410<br>(31.67) | 94,900<br>(33.84) | 99,929<br>(35.51) | 101,725<br>(36.02) | 102,467<br>(36.14)<br><i>100</i> |
| MET                                                                                                                    | 11,313<br>(4.21)<br><i>25.1</i> | 14,109<br>(5.23)  | 16,788<br>(6.21)  | 19,686<br>(7.25)  | 23,303<br>(8.56)  | 27,781<br>(10.19) | 32,301<br>(11.81) | 36,844<br>(13.44) | 41,924<br>(15.24) | 47,622<br>(17.23) | 53,524<br>(19.26) | 59,783<br>(21.42) | 67,316<br>(24.01) | 72,452<br>(25.75) | 73,705<br>(26.1)   | 73,929<br>(26.08)<br><i>72.1</i> |
| INS                                                                                                                    | 18,428<br>(6.86)<br><i>40.9</i> | 19,462<br>(7.22)  | 20,246<br>(7.48)  | 21,351<br>(7.87)  | 22,583<br>(8.3)   | 24,027<br>(8.81)  | 25,434<br>(9.3)   | 26,627<br>(9.71)  | 27,752<br>(10.09) | 28,607<br>(10.35) | 29,289<br>(10.54) | 29,851<br>(10.69) | 30,098<br>(10.73) | 30,676<br>(10.9)  | 31,377<br>(11.11)  | 32,140<br>(11.34)<br><i>31.4</i> |
| SU                                                                                                                     | 25,660<br>(9.55)<br><i>57.0</i> | 25,753<br>(9.55)  | 26,119<br>(9.66)  | 26,259<br>(9.67)  | 27,169<br>(9.98)  | 27,741<br>(10.17) | 27,774<br>(10.16) | 27,285<br>(9.95)  | 27,168<br>(9.88)  | 26,349<br>(9.54)  | 24,748<br>(8.9)   | 23,368<br>(8.37)  | 21,128<br>(7.53)  | 18,669<br>(6.63)  | 16,415<br>(5.81)   | 14,341<br>(5.06)<br><i>14.0</i>  |
| GLP-1                                                                                                                  | -                               | -                 | -                 | -                 | -                 | -                 | -                 | -                 | 68<br>(0.02)      | 529<br>(0.19)     | 1,469<br>(0.52)   | 4,462<br>(1.6)    | 6,547<br>(2.33)   | 7,874<br>(2.8)    | 8,369<br>(2.96)    | 8,574<br>(3.02)<br><i>8.4</i>    |
| DPP-4 I                                                                                                                | -                               | -                 | -                 | -                 | -                 | -                 | -                 | -                 | 939<br>(0.34)     | 2,594<br>(0.94)   | 3,122<br>(1.12)   | 4,031<br>(1.44)   | 4,926<br>(1.76)   | 5,558<br>(1.98)   | 6,321<br>(2.24)    | 7,300<br>(2.57)<br><i>7.1</i>    |
| MET + DPP-4 I                                                                                                          | -                               | -                 | -                 | -                 | -                 | -                 | -                 | -                 | -                 | 387<br>(0.14)     | 1,484<br>(0.54)   | 2,662<br>(0.95)   | 3,769<br>(1.34)   | 4,501<br>(1.6)    | 5,226<br>(1.85)    | 5,818<br>(2.05)<br><i>5.7</i>    |
| SGLT-2 I                                                                                                               | -                               | -                 | -                 | -                 | -                 | -                 | -                 | -                 | -                 | -                 | -                 | -                 | -                 | 6<br>(0)          | 790<br>(0.28)      | 1,737<br>(0.61)<br><i>1.7</i>    |
| MEGLI                                                                                                                  | 929<br>(0.35)<br><i>2.06</i>    | 1,134<br>(0.42)   | 1,200<br>(0.44)   | 1,173<br>(0.43)   | 1,163<br>(0.43)   | 1,027<br>(0.38)   | 924<br>(0.34)     | 830<br>(0.3)      | 762<br>(0.28)     | 698<br>(0.25)     | 607<br>(0.22)     | 546<br>(0.2)      | 442<br>(0.16)     | 374<br>(0.13)     | 358<br>(0.13)      | 325<br>(0.11)<br><i>0.3</i>      |
| A-GLU                                                                                                                  | 1,049<br>(0.39)<br><i>2.3</i>   | 870<br>(0.32)     | 767<br>(0.28)     | 610<br>(0.22)     | 524<br>(0.19)     | 445<br>(0.16)     | 377<br>(0.14)     | 339<br>(0.12)     | 292<br>(0.11)     | 274<br>(0.1)      | 226<br>(0.08)     | 197<br>(0.07)     | 166<br>(0.06)     | 150<br>(0.05)     | 130<br>(0.05)      | 92<br>(0.03)<br><i>0.09</i>      |
| GLITZ                                                                                                                  | -                               | 47<br>(0.02)      | 344<br>(0.13)     | 363<br>(0.13)     | 399<br>(0.15)     | 470<br>(0.17)     | 534<br>(0.2)      | 653<br>(0.24)     | 723<br>(0.26)     | 607<br>(0.22)     | 570<br>(0.21)     | 437<br>(0.16)     | 128<br>(0.05)     | 106<br>(0.04)     | 95<br>(0.03)       | 63<br>(0.02)<br><i>0.06</i>      |
| MET + SGLT-2 I                                                                                                         | -                               | -                 | -                 | -                 | -                 | -                 | -                 | -                 | -                 | -                 | -                 | -                 | -                 | -                 | -                  | 44<br>(0.02)<br><i>0.04</i>      |
| MET + GLITZ                                                                                                            | -                               | -                 | -                 | -                 | -                 | 324<br>(0.12)     | 675<br>(0.25)     | 1,175<br>(0.43)   | 1,489<br>(0.54)   | 1,299<br>(0.47)   | 1,150<br>(0.41)   | 987<br>(0.35)     | 29<br>(0.01)      | -                 | -                  | -                                |

**Notes:** The percentage of patients prescribed different therapies is shown for the first year 1999 and for last year 2014 (written in italics)  
The number of patients prescribed different therapies in a given year is higher than the total number of glucose-lowering drug users that year due to possibility of polypharmacy and drug-shifters  
**Abbreviations:** MET, metformin; INS, insulin; SU, sulfonylureas; GLP-1, glucagon-like peptide 1 agonists; DPP-4 I, dipeptidylpeptidase 4 inhibitors; MET + DPP-4 I, combination formula with metformin + dipeptidylpeptidase 4 inhibitor; SGLT-2 I, sodium glucose co-transporter 2 inhibitors; MEGLI, meglitinides; A-GLU, alfa glucosidase inhibitors; GLITZ, thiazolidinediones; MET + SGLT-2 I, combination formula with metformin + sodium glucose co-transporter 2 inhibitors); MET + GLITZ, combination formula with metformin + thiazolidinediones.

**Table S2: Annual prevalence of insulin users in Denmark (per 1,000 inhabitants), 1999-2014, women**

|        | 1999                            | 2000             | 2001             | 2002             | 2003             | 2004             | 2005             | 2006             | 2007              | 2008              | 2009              | 2010              | 2011              | 2012             | 2013              | 2014                            |
|--------|---------------------------------|------------------|------------------|------------------|------------------|------------------|------------------|------------------|-------------------|-------------------|-------------------|-------------------|-------------------|------------------|-------------------|---------------------------------|
| INS    | 18,428<br>(6.86)<br><i>100</i>  | 19,462<br>(7.22) | 20,246<br>(7.48) | 21,351<br>(7.87) | 22,583<br>(8.3)  | 24,027<br>(8.81) | 25,434<br>(9.3)  | 26,627<br>(9.71) | 27,752<br>(10.09) | 28,607<br>(10.35) | 29,289<br>(10.54) | 29,851<br>(10.69) | 30,098<br>(10.73) | 30,676<br>(10.9) | 31,377<br>(11.11) | 32,140<br>(11.34)<br><i>100</i> |
| LONG   | 2<br>(0)<br><i>0.01</i>         | 4<br>(0)         | -                | -                | -                | 1,261<br>(0.46)  | 3,393<br>(1.24)  | 4,644<br>(1.69)  | 5,711<br>(2.08)   | 8,355<br>(3.02)   | 10,596<br>(3.81)  | 11,872<br>(4.25)  | 12,972<br>(4.63)  | 14,016<br>(4.98) | 14,864<br>(5.26)  | 16,130<br>(5.69)<br><i>50.2</i> |
| FAST   | 9,177<br>(3.41)<br><i>49.8</i>  | 9,673<br>(3.59)  | 9,827<br>(3.63)  | 10,350<br>(3.81) | 10,843<br>(3.98) | 11,280<br>(4.14) | 11,767<br>(4.3)  | 12,239<br>(4.46) | 12,781<br>(4.65)  | 13,205<br>(4.78)  | 13,690<br>(4.93)  | 14,060<br>(5.04)  | 14,328<br>(5.11)  | 14,896<br>(5.29) | 15,322<br>(5.43)  | 16,006<br>(5.65)<br><i>49.8</i> |
| INTERM | 15,010<br>(5.58)<br><i>81.5</i> | 15,783<br>(5.85) | 15,906<br>(5.88) | 16,949<br>(6.24) | 17,528<br>(6.44) | 17,689<br>(6.49) | 17,004<br>(6.22) | 16,010<br>(5.84) | 15,353<br>(5.58)  | 14,009<br>(5.07)  | 12,154<br>(4.37)  | 11,008<br>(3.94)  | 10,015<br>(3.57)  | 9,524<br>(3.38)  | 9,326<br>(3.3)    | 8,904<br>(3.14)<br><i>27.7</i>  |
| MIXED  | 5,934<br>(2.21)<br><i>32.2</i>  | 6,406<br>(2.38)  | 6,836<br>(2.53)  | 7,217<br>(2.66)  | 7,953<br>(2.92)  | 8,759<br>(3.21)  | 9,405<br>(3.44)  | 9,979<br>(3.64)  | 10,642<br>(3.87)  | 10,226<br>(3.7)   | 9,449<br>(3.4)    | 8,871<br>(3.18)   | 8,257<br>(2.94)   | 7,783<br>(2.77)  | 7,365<br>(2.61)   | 6,925<br>(2.44)<br><i>21.5</i>  |

**Notes:** The percentage of patients prescribed different insulin subtypes is shown for the first year 1999 and last year 2014 (written in italics). The number of patients prescribed different insulin subtypes in a given year is higher than the total number of insulin users that year due to possibility of polypharmacy and drug-shifters.

**Abbreviations:** INS, insulin; LONG, long-acting insulin; FAST, fast-acting insulin; INTERM, intermediate-acting insulin; MIXED, combination formula (intermediate-/long-acting insulin + fast-acting insulin).

| <b>Tables S3: Annual prevalence of glucose-lowering drug users in Denmark (per 1,000 inhabitants), 1999-2014, men</b> |                                  |                   |                   |                   |                   |                   |                   |                   |                   |                   |                    |                    |                    |                   |                    |                                  |
|-----------------------------------------------------------------------------------------------------------------------|----------------------------------|-------------------|-------------------|-------------------|-------------------|-------------------|-------------------|-------------------|-------------------|-------------------|--------------------|--------------------|--------------------|-------------------|--------------------|----------------------------------|
|                                                                                                                       | 1999                             | 2000              | 2001              | 2002              | 2003              | 2004              | 2005              | 2006              | 2007              | 2008              | 2009               | 2010               | 2011               | 2012              | 2013               | 2014                             |
| TOTAL                                                                                                                 | 53,303<br>(20.3)<br><i>100</i>   | 56,555<br>(21.47) | 60,030<br>(22.7)  | 63,838<br>(24.05) | 68,713<br>(25.81) | 73,688<br>(27.6)  | 78,359<br>(29.27) | 83,600<br>(31.3)  | 89,271<br>(33.1)  | 95,880<br>(35.35) | 102,650<br>(37.57) | 110,166<br>(40.16) | 118,930<br>(43.14) | 125,610<br>(45.4) | 128,410<br>(46.21) | 130,763<br>(46.83)<br><i>100</i> |
| MET                                                                                                                   | 11,424<br>(4.35)<br><i>21.4</i>  | 14,864<br>(5.64)  | 18,269<br>(6.91)  | 22,005<br>(8.29)  | 26,598<br>(9.99)  | 31,749<br>(11.89) | 36,213<br>(13.53) | 41,456<br>(15.43) | 47,815<br>(17.73) | 55,742<br>(20.55) | 64,071<br>(23.45)  | 72,954<br>(26.59)  | 82,976<br>(30.1)   | 89,984<br>(32.52) | 92,039<br>(33.12)  | 93,387<br>(33.44)<br><i>71.4</i> |
| INS                                                                                                                   | 22,005<br>(8.38)<br><i>41.3</i>  | 23,345<br>(8.86)  | 24,223<br>(9.16)  | 25,745<br>(9.7)   | 27,477<br>(10.32) | 29,333<br>(10.99) | 31,072<br>(11.61) | 32,888<br>(12.24) | 34,864<br>(12.93) | 36,401<br>(13.42) | 37,975<br>(13.9)   | 39,058<br>(14.24)  | 40,102<br>(14.55)  | 41,229<br>(14.9)  | 42,533<br>(15.31)  | 43,704<br>(15.65)<br><i>33.4</i> |
| SU                                                                                                                    | 30,060<br>(11.45)<br><i>56.4</i> | 30,597<br>(11.62) | 31,747<br>(12.01) | 32,675<br>(12.31) | 34,204<br>(12.85) | 35,291<br>(13.22) | 36,091<br>(13.48) | 36,429<br>(13.56) | 36,611<br>(13.58) | 36,081<br>(13.3)  | 34,800<br>(12.74)  | 33,049<br>(12.05)  | 30,352<br>(11.01)  | 26,868<br>(9.71)  | 23,748<br>(8.55)   | 21,094<br>(7.55)<br><i>16.1</i>  |
| GLP-1                                                                                                                 | -                                | -                 | -                 | -                 | -                 | -                 | -                 | -                 | 110<br>(0.04)     | 655<br>(0.24)     | 1,999<br>(0.73)    | 6,010<br>(2.19)    | 8,732<br>(3.17)    | 10,542<br>(3.81)  | 11,287<br>(4.06)   | 11,373<br>(4.07)<br><i>8.7</i>   |
| DPP-4 I                                                                                                               | -                                | -                 | -                 | -                 | -                 | -                 | -                 | -                 | 1,362<br>(0.51)   | 3,725<br>(1.37)   | 4,564<br>(1.67)    | 5,903<br>(2.15)    | 6,900<br>(2.5)     | 7,568<br>(2.74)   | 8,773<br>(3.16)    | 10,144<br>(3.63)<br><i>7.8</i>   |
| MET +<br>DPP-4 I                                                                                                      | -                                | -                 | -                 | -                 | -                 | -                 | -                 | -                 | -                 | 542<br>(0.2)      | 2,189<br>(0.8)     | 4,100<br>(1.49)    | 5,877<br>(2.13)    | 7,240<br>(2.62)   | 8,494<br>(3.06)    | 9,782<br>(3.49)<br><i>7.5</i>    |
| SGLT-2 I                                                                                                              | -                                | -                 | -                 | -                 | -                 | -                 | -                 | -                 | -                 | -                 | -                  | -                  | -                  | 14<br>(0.1)       | 1,176<br>(0.42)    | 2,661<br>(0.95)<br><i>2.0</i>    |
| MEGLI                                                                                                                 | 1,237<br>(0.47)<br><i>2.3</i>    | 1,497<br>(0.57)   | 1,594<br>(0.6)    | 1,639<br>(0.62)   | 1,645<br>(0.62)   | 1,418<br>(0.53)   | 1,322<br>(0.49)   | 1,222<br>(0.45)   | 1,116<br>(0.41)   | 1,026<br>(0.38)   | 902<br>(0.33)      | 803<br>(0.29)      | 679<br>(0.25)      | 566<br>(0.2)      | 525<br>(0.19)      | 464<br>(0.17)<br><i>0.4</i>      |
| A-GLU                                                                                                                 | 1,176<br>(0.45)<br><i>2.2</i>    | 1,010<br>(0.38)   | 878<br>(0.33)     | 692<br>(0.26)     | 598<br>(0.22)     | 513<br>(0.19)     | 442<br>(0.17)     | 380<br>(0.14)     | 323<br>(0.12)     | 293<br>(0.11)     | 252<br>(0.09)      | 219<br>(0.08)      | 185<br>(0.07)      | 169<br>(0.06)     | 143<br>(0.05)      | 70<br>(0.03)<br><i>0.05</i>      |
| GLITZ                                                                                                                 | -                                | 55<br>(0.02)      | 382<br>(0.14)     | 456<br>(0.17)     | 475<br>(0.18)     | 558<br>(0.21)     | 621<br>(0.23)     | 749<br>(0.28)     | 853<br>(0.32)     | 755<br>(0.28)     | 712<br>(0.26)      | 564<br>(0.21)      | 181<br>(0.07)      | 146<br>(0.05)     | 119<br>(0.04)      | 91<br>(0.03)<br><i>0.07</i>      |
| MET +<br>SGLT-2 I                                                                                                     | -                                | -                 | -                 | -                 | -                 | -                 | -                 | -                 | -                 | -                 | -                  | -                  | -                  | -                 | -                  | 79<br>(0.03)<br><i>0.06</i>      |
| MET +<br>GLITZ                                                                                                        | -                                | -                 | -                 | -                 | 1<br>(0)          | 415<br>(0.16)     | 927<br>(0.35)     | 1,722<br>(0.64)   | 2,255<br>(0.84)   | 1,975<br>(0.73)   | 1,766<br>(0.65)    | 1,454<br>(0.53)    | 56<br>(0.02)       | -                 | -                  | -                                |

**Notes:** The percentage of patients prescribed different therapies is shown for the first year 1999 and for last year 2014 (written in italics)  
The number of patients prescribed different therapies in a given year is higher than the total number of glucose-lowering drug users that year due to possibility of polypharmacy and drug-shifters  
**Abbreviations:** MET, metformin; INS, insulin; SU, sulfonylureas; GLP-1, glucagon-like peptide 1 agonists; DPP-4 I, dipeptidylpeptidase 4 inhibitors; MET + DPP-4 I, combination formula with metformin + dipeptidylpeptidase 4 inhibitor; SGLT-2 I, sodium glucose co-transporter 2 inhibitors; MEGLI, meglitinides; A-GLU, alfa glucosidase inhibitors; GLITZ, thiazolidinediones; MET + SGLT-2 I, combination formula with metformin + sodium glucose co-transporter 2 inhibitors); MET + GLITZ, combination formula with metformin + thiazolidinediones.

| <b>Table S4: Annual prevalence of insulin users in Denmark (per 1,000 inhabitants), 1999-2014, men</b>                                                                                                                                                                                                                                                                                                                                                                                                                                                                                    |                                 |                  |                  |                  |                   |                   |                   |                   |                   |                   |                  |                   |                   |                  |                   |                                 |
|-------------------------------------------------------------------------------------------------------------------------------------------------------------------------------------------------------------------------------------------------------------------------------------------------------------------------------------------------------------------------------------------------------------------------------------------------------------------------------------------------------------------------------------------------------------------------------------------|---------------------------------|------------------|------------------|------------------|-------------------|-------------------|-------------------|-------------------|-------------------|-------------------|------------------|-------------------|-------------------|------------------|-------------------|---------------------------------|
|                                                                                                                                                                                                                                                                                                                                                                                                                                                                                                                                                                                           | <b>1999</b>                     | <b>2000</b>      | <b>2001</b>      | <b>2002</b>      | <b>2003</b>       | <b>2004</b>       | <b>2005</b>       | <b>2006</b>       | <b>2007</b>       | <b>2008</b>       | <b>2009</b>      | <b>2010</b>       | <b>2011</b>       | <b>2012</b>      | <b>2013</b>       | <b>2014</b>                     |
| INS                                                                                                                                                                                                                                                                                                                                                                                                                                                                                                                                                                                       | 22,005<br>(8.38)<br><i>100</i>  | 23,345<br>(8.86) | 24,223<br>(9.16) | 25,745<br>(9.7)  | 27,477<br>(10.32) | 29,333<br>(10.99) | 31,072<br>(11.61) | 32,888<br>(12.24) | 34,864<br>(12.93) | 36,401<br>(13.42) | 37,975<br>(13.9) | 39,058<br>(14.24) | 40,102<br>(14.55) | 41,229<br>(14.9) | 42,533<br>(15.31) | 43,704<br>(15.65)<br><i>100</i> |
| LONG                                                                                                                                                                                                                                                                                                                                                                                                                                                                                                                                                                                      | 6<br>(0)<br><i>0.03</i>         | 6<br>(0)         | -                | -                | -                 | 1,340<br>(0.5)    | 3,757<br>(1.4)    | 5,252<br>(1.96)   | 6,564<br>(2.43)   | 10,125<br>(3.73)  | 13,464<br>(4.93) | 15,777<br>(5.75)  | 17,807<br>(6.46)  | 19,623<br>(7.09) | 20,964<br>(7.54)  | 22,889<br>(8.2)<br><i>52.4</i>  |
| FAST                                                                                                                                                                                                                                                                                                                                                                                                                                                                                                                                                                                      | 12,459<br>(4.75)<br><i>56.6</i> | 12,997<br>(4.93) | 13,279<br>(5.02) | 14,039<br>(5.29) | 14,555<br>(5.47)  | 15,073<br>(5.65)  | 15,686<br>(5.86)  | 16,285<br>(6.06)  | 16,985<br>(6.3)   | 17,721<br>(6.53)  | 18,459<br>(6.76) | 19,159<br>(6.98)  | 19,665<br>(7.13)  | 20,302<br>(7.34) | 21,001<br>(7.56)  | 21,712<br>(7.78)<br><i>49.7</i> |
| INTERM                                                                                                                                                                                                                                                                                                                                                                                                                                                                                                                                                                                    | 18,398<br>(7.01)<br><i>83.6</i> | 19,266<br>(7.31) | 19,377<br>(7.33) | 20,753<br>(7.82) | 21,728<br>(8.16)  | 21,942<br>(8.22)  | 21,219<br>(7.93)  | 20,429<br>(7.61)  | 19,793<br>(7.34)  | 18,204<br>(6.71)  | 16,120<br>(5.9)  | 14,668<br>(5.35)  | 13,435<br>(4.87)  | 12,802<br>(4.63) | 12,720<br>(4.58)  | 12,230<br>(4.38)<br><i>28.0</i> |
| MIXED                                                                                                                                                                                                                                                                                                                                                                                                                                                                                                                                                                                     | 6,120<br>(2.33)<br><i>27.8</i>  | 6,688<br>(2.54)  | 7,174<br>(2.71)  | 7,782<br>(2.93)  | 8,729<br>(3.28)   | 9,916<br>(3.71)   | 10,813<br>(4.04)  | 11,827<br>(4.4)   | 12,894<br>(4.78)  | 12,895<br>(4.75)  | 12,207<br>(4.47) | 11,546<br>(4.21)  | 10,898<br>(3.95)  | 10,296<br>(3.72) | 9,723<br>(3.5)    | 9,106<br>(3.26)<br><i>20.8</i>  |
| <p><b>Notes:</b> The percentage of patients prescribed different insulin subtypes is shown for the first year 1999 and last year 2014 (written in italics). The number of patients prescribed different insulin subtypes in a given year is higher than the total number of insulin users that year due to possibility of polypharmacy and drug-shifters.</p> <p><b>Abbreviations:</b> INS, insulin; LONG, long-acting insulin; FAST, fast-acting insulin; INTERM, intermediate-acting insulin; MIXED, combination formula (intermediate-/long-acting insulin + fast-acting insulin).</p> |                                 |                  |                  |                  |                   |                   |                   |                   |                   |                   |                  |                   |                   |                  |                   |                                 |

| <b>Table S5: Annual prevalence of glucose-lowering drug users in Denmark (per 1,000 inhabitants), 1999-2014, age-group &lt; 20 years</b> |                                |                 |                 |                 |                 |                 |                 |                 |                 |                 |                 |                 |                  |                  |                  |                                 |
|------------------------------------------------------------------------------------------------------------------------------------------|--------------------------------|-----------------|-----------------|-----------------|-----------------|-----------------|-----------------|-----------------|-----------------|-----------------|-----------------|-----------------|------------------|------------------|------------------|---------------------------------|
|                                                                                                                                          | 1999                           | 2000            | 2001            | 2002            | 2003            | 2004            | 2005            | 2006            | 2007            | 2008            | 2009            | 2010            | 2011             | 2012             | 2013             | 2014                            |
| TOTAL                                                                                                                                    | 2,052<br>(6.87)<br><i>100</i>  | 2,103<br>(6.99) | 2,169<br>(7.13) | 2,287<br>(7.39) | 2,399<br>(7.63) | 2,579<br>(8.05) | 2,765<br>(8.48) | 2,905<br>(8.76) | 3,042<br>(9.06) | 3,183<br>(9.37) | 3,288<br>(9.6)  | 3,427<br>(9.94) | 3,533<br>(10.22) | 3,627<br>(10.46) | 3,656<br>(10.61) | 3,663<br>(10.68)<br><i>100</i>  |
| MET                                                                                                                                      | 18<br>(0.07)<br><i>0.9</i>     | 18<br>(0.07)    | 28<br>(0.1)     | 49<br>(0.17)    | 71<br>(0.23)    | 73<br>(0.24)    | 127<br>(0.42)   | 151<br>(0.47)   | 188<br>(0.58)   | 207<br>(0.61)   | 226<br>(0.67)   | 271<br>(0.77)   | 265<br>(0.76)    | 275<br>(0.77)    | 253<br>(0.71)    | 239<br>(0.68)<br><i>6.5</i>     |
| INS                                                                                                                                      | 2,029<br>(6.79)<br><i>98.9</i> | 2,082<br>(6.93) | 2,142<br>(7.04) | 2,238<br>(7.22) | 2,328<br>(7.38) | 2,496<br>(7.78) | 2,642<br>(8.08) | 2,751<br>(8.28) | 2,853<br>(8.48) | 2,971<br>(8.74) | 3,068<br>(8.94) | 3,174<br>(9.21) | 3,277<br>(9.49)  | 3,363<br>(9.73)  | 3,415<br>(9.94)  | 3,430<br>(10.02)<br><i>93.6</i> |
| SU                                                                                                                                       | 14<br>(0.05)<br><i>0.7</i>     | 12<br>(0.04)    | 12<br>(0.04)    | 20<br>(0.07)    | 22<br>(0.08)    | 25<br>(0.08)    | 18<br>(0.06)    | 19<br>(0.06)    | 26<br>(0.08)    | 29<br>(0.08)    | 25<br>(0.08)    | 19<br>(0.05)    | 24<br>(0.07)     | 25<br>(0.08)     | 18<br>(0.04)     | 10<br>(0.03)<br><i>0.3</i>      |
| GLP-1                                                                                                                                    | -                              | -               | -               | -               | -               | -               | -               | -               | -               | -               | 3<br>(0.01)     | 6<br>(0.02)     | 10<br>(0.03)     | 14<br>(0.04)     | 12<br>(0.03)     | 12<br>(0.04)<br><i>0.3</i>      |
| DPP-4 I                                                                                                                                  | -                              | -               | -               | -               | -               | -               | -               | -               | 2<br>(0.01)     | -               | 4<br>(0.01)     | 2<br>(0.01)     | 2<br>(0.01)      | 3<br>(0.01)      | 5<br>(0.01)      | 7<br>(0.02)<br><i>0.2</i>       |
| MET + DPP-4 I                                                                                                                            | -                              | -               | -               | -               | -               | -               | -               | -               | -               | -               | -               | -               | 2<br>(0.01)      | 2<br>(0)         | -                | 2<br>(0)<br><i>0.05</i>         |
| SGLT-2 I                                                                                                                                 | -                              | -               | -               | -               | -               | -               | -               | -               | -               | -               | -               | -               | -                | -                | 2<br>(0.01)      | 2<br>(0)<br><i>0.05</i>         |
| MEGLI                                                                                                                                    | 2<br>(0.01)<br><i>0.1</i>      | 1<br>(0)        | 2<br>(0.01)     | 2<br>(0)        | 2<br>(0)        | 2<br>(0)        | 1<br>(0)        | 1<br>(0)        | 0<br>-          | 1<br>(0)        | 2<br>(0.01)     | 3<br>(0.01)     | 2<br>(0.01)      | 2<br>(0.01)      | 4<br>(0.01)      | 5<br>(0.02)<br><i>0.14</i>      |
| A-GLU                                                                                                                                    | 1<br>(0)<br><i>0.05</i>        | 1<br>(0)        | 2<br>(0.01)     | 2<br>(0.01)     | 2<br>(0.01)     | 1<br>(0)        | -               | -               | -               | -               | -               | -               | -                | -                | -                | -                               |
| GLITZ                                                                                                                                    | -                              | -               | -               | 2<br>(0.01)     | 2<br>(0.01)     | 2<br>(0.01)     | 2<br>(0.01)     | 2<br>(0.01)     | 1<br>(0)        | 1<br>(0)        | -               | -               | -                | -                | -                | -                               |
| MET + SGLT-2 I                                                                                                                           | -                              | -               | -               | -               | -               | -               | -               | -               | -               | -               | -               | -               | -                | -                | -                | -                               |
| MET + GLITZ                                                                                                                              | -                              | -               | -               | -               | -               | -               | -               | -               | 1<br>(0)        | 3<br>(0.01)     | -               | -               | -                | -                | -                | -                               |

**Notes:** The percentage of patients prescribed different therapies is shown for the first year 1999 and for last year 2014 (written in italics)  
The number of patients prescribed different therapies in a given year is higher than the total number of glucose-lowering drug users that year due to possibility of polypharmacy and drug-shifters  
**Abbreviations:** MET, metformin; INS, insulin; SU, sulfonylureas; GLP-1, glucagon-like peptide 1 agonists; DPP-4 I, dipeptidylpeptidase 4 inhibitors; MET + DPP-4 I, combination formula with metformin + dipeptidylpeptidase 4 inhibitor; SGLT-2 I, sodium glucose co-transporter 2 inhibitors; MEGLI, meglitinides; A-GLU, alfa glucosidase inhibitors; GLITZ, thiazolidinediones; MET + SGLT-2 I, combination formula with metformin + sodium glucose co-transporter 2 inhibitors); MET + GLITZ, combination formula with metformin + thiazolidinediones.

| <b>Table S6: Annual prevalence of glucose-lowering drug users in Denmark (per 1,000 inhabitants), 1999-2014, age-group 20-39 years</b> |                                |                  |                  |                  |                  |                  |                  |                 |                   |                   |                  |                   |                   |                   |                   |                                 |
|----------------------------------------------------------------------------------------------------------------------------------------|--------------------------------|------------------|------------------|------------------|------------------|------------------|------------------|-----------------|-------------------|-------------------|------------------|-------------------|-------------------|-------------------|-------------------|---------------------------------|
|                                                                                                                                        | 1999                           | 2000             | 2001             | 2002             | 2003             | 2004             | 2005             | 2006            | 2007              | 2008              | 2009             | 2010              | 2011              | 2012              | 2013              | 2014                            |
| TOTAL                                                                                                                                  | 9,944<br>(6.42)<br><i>100</i>  | 10,208<br>(6.63) | 10,307<br>(6.75) | 10,693<br>(7.08) | 11,236<br>(7.54) | 12,025<br>(8.21) | 13,199<br>(9.19) | 14,122<br>(10)  | 14,735<br>(10.62) | 14,962<br>(10.86) | 15,446<br>(11.2) | 15,921<br>(11.55) | 16,104<br>(11.66) | 16,291<br>(11.81) | 16,295<br>(11.79) | 16,076<br>(11.57)<br><i>100</i> |
| MET                                                                                                                                    | 937<br>(0.6)<br><i>9.4</i>     | 1,289<br>(0.84)  | 1,589<br>(1.04)  | 1,981<br>(1.31)  | 2,613<br>(1.75)  | 3,589<br>(2.45)  | 4,928<br>(3.43)  | 5,996<br>(4.25) | 6,691<br>(4.82)   | 7,053<br>(5.12)   | 7,717<br>(5.6)   | 8,279<br>(6.01)   | 8,493<br>(6.15)   | 8,653<br>(6.27)   | 8,514<br>(6.16)   | 8,190<br>(5.89)<br><i>50.9</i>  |
| INS                                                                                                                                    | 8,457<br>(5.46)<br><i>85.0</i> | 8,498<br>(5.52)  | 8,384<br>(5.49)  | 8,422<br>(5.58)  | 8,453<br>(5.67)  | 8,393<br>(5.73)  | 8,335<br>(5.8)   | 8,315<br>(5.89) | 8,310<br>(5.99)   | 8,313<br>(6.03)   | 8,287<br>(6.01)  | 8,217<br>(5.96)   | 8,149<br>(5.9)    | 8,159<br>(5.91)   | 8,231<br>(5.96)   | 8,351<br>(6.01)<br><i>51.9</i>  |
| SU                                                                                                                                     | 1,163<br>(0.75)<br><i>11.7</i> | 1,128<br>(0.73)  | 1,174<br>(0.77)  | 1,254<br>(0.83)  | 1,254<br>(0.84)  | 1,283<br>(0.88)  | 1,253<br>(0.87)  | 1,226<br>(0.87) | 1,165<br>(0.84)   | 1,128<br>(0.82)   | 1,067<br>(0.77)  | 929<br>(0.67)     | 820<br>(0.59)     | 682<br>(0.49)     | 600<br>(0.43)     | 513<br>(0.37)<br><i>3.2</i>     |
| GLP-1                                                                                                                                  | -                              | -                | -                | -                | -                | -                | -                | -               | 18<br>(0.01)      | 105<br>(0.08)     | 240<br>(0.17)    | 623<br>(0.45)     | 846<br>(0.61)     | 971<br>(0.7)      | 957<br>(0.69)     | 895<br>(0.64)<br><i>5.6</i>     |
| DPP-4 I                                                                                                                                | -                              | -                | -                | -                | -                | -                | -                | -               | 83<br>(0.06)      | 228<br>(0.17)     | 233<br>(0.17)    | 231<br>(0.17)     | 264<br>(0.19)     | 264<br>(0.19)     | 305<br>(0.22)     | 346<br>(0.25)<br><i>2.2</i>     |
| MET + DPP-4 I                                                                                                                          | -                              | -                | -                | -                | -                | -                | -                | -               | -                 | 28<br>(0.02)      | 127<br>(0.09)    | 176<br>(0.13)     | 213<br>(0.15)     | 267<br>(0.19)     | 333<br>(0.24)     | 375<br>(0.26)<br><i>2.3</i>     |
| SGLT-2 I                                                                                                                               | -                              | -                | -                | -                | -                | -                | -                | -               | -                 | -                 | -                | -                 | -                 | -                 | 76<br>(0.05)      | 159<br>(0.11)<br><i>1.0</i>     |
| MEGLI                                                                                                                                  | 78<br>(0.05)<br><i>0.8</i>     | 89<br>(0.06)     | 90<br>(0.06)     | 82<br>(0.05)     | 65<br>(0.04)     | 58<br>(0.04)     | 59<br>(0.04)     | 45<br>(0.03)    | 33<br>(0.02)      | 29<br>(0.02)      | 31<br>(0.02)     | 26<br>(0.02)      | 25<br>(0.02)      | 23<br>(0.02)      | 20<br>(0.01)      | 11<br>(0.01)<br><i>0.07</i>     |
| A-GLU                                                                                                                                  | 61<br>(0.04)<br><i>0.6</i>     | 28<br>(0.02)     | 26<br>(0.02)     | 20<br>(0.01)     | 19<br>(0.01)     | 14<br>(0.01)     | 13<br>(0.01)     | 12<br>(0.01)    | 13<br>(0.01)      | 10<br>(0.01)      | 10<br>(0.01)     | 11<br>(0.01)      | 10<br>(0.01)      | 5<br>(0)          | 14<br>(0.01)      | 15<br>(0.01)<br><i>0.09</i>     |
| GLITZ                                                                                                                                  | -                              | 3<br>(0)         | 19<br>(0.01)     | 26<br>(0.02)     | 44<br>(0.03)     | 42<br>(0.03)     | 48<br>(0.03)     | 65<br>(0.05)    | 73<br>(0.05)      | 53<br>(0.04)      | 51<br>(0.04)     | 27<br>(0.02)      | 9<br>(0.01)       | 7<br>(0.01)       | 7<br>(0.01)       | 7<br>(0.01)<br><i>0.04</i>      |
| MET + SGLT-2 I                                                                                                                         | -                              | -                | -                | -                | -                | -                | -                | -               | -                 | -                 | -                | -                 | -                 | -                 | -                 | 5<br>(0)<br><i>0.03</i>         |
| MET + GLITZ                                                                                                                            | -                              | -                | -                | -                | -                | 31<br>(0.02)     | 58<br>(0.04)     | 107<br>(0.08)   | 129<br>(0.09)     | 99<br>(0.07)      | 77<br>(0.06)     | 38<br>(0.03)      | -                 | -                 | -                 | -                               |

**Notes:** The percentage of patients prescribed different therapies is shown for the first year 1999 and for last year 2014 (written in italics)  
The number of patients prescribed different therapies in a given year is higher than the total number of glucose-lowering drug users that year due to possibility of polypharmacy and drug-shifters  
**Abbreviations:** MET, metformin; INS, insulin; SU, sulfonylureas; GLP-1, glucagon-like peptide 1 agonists; DPP-4 I, dipeptidylpeptidase 4 inhibitors; MET + DPP-4 I, combination formula with metformin + dipeptidylpeptidase 4 inhibitor; SGLT-2 I, sodium glucose co-transporter 2 inhibitors; MEGLI, meglitinides; A-GLU, alfa glucosidase inhibitors; GLITZ, thiazolidinediones; MET + SGLT-2 I, combination formula with metformin + sodium glucose co-transporter 2 inhibitors); MET + GLITZ, combination formula with metformin + thiazolidinediones.

| <b>Table S7: Annual prevalence of glucose-lowering drug users in Denmark (per 1,000 inhabitants), 1999-2014, age-group 40-64 years</b> |                           |                   |                   |                   |                   |                   |                   |                   |                   |                   |                   |                   |                   |                   |                   |                           |
|----------------------------------------------------------------------------------------------------------------------------------------|---------------------------|-------------------|-------------------|-------------------|-------------------|-------------------|-------------------|-------------------|-------------------|-------------------|-------------------|-------------------|-------------------|-------------------|-------------------|---------------------------|
|                                                                                                                                        | 1999                      | 2000              | 2001              | 2002              | 2003              | 2004              | 2005              | 2006              | 2007              | 2008              | 2009              | 2010              | 2011              | 2012              | 2013              | 2014                      |
| TOTAL                                                                                                                                  | 41,726<br>(24.28)<br>100  | 44,839<br>(25.82) | 48,116<br>(27.38) | 51,538<br>(29.02) | 55,918<br>(31.16) | 60,373<br>(33.24) | 64,409<br>(35.01) | 68,941<br>(37.01) | 73,564<br>(38.97) | 78,241<br>(41.17) | 82,666<br>(43.38) | 87,402<br>(45.97) | 92,397<br>(48.79) | 95,458<br>(50.58) | 95,343<br>(50.58) | 95,007<br>(50.39)<br>100  |
| MET                                                                                                                                    | 11,776<br>(6.85)<br>28.2  | 15,266<br>(8.79)  | 18,741<br>(10.67) | 22,248<br>(12.53) | 26,541<br>(14.79) | 31,271<br>(17.22) | 35,330<br>(19.2)  | 39,855<br>(21.4)  | 44,933<br>(23.8)  | 51,017<br>(26.84) | 56,760<br>(29.78) | 62,547<br>(32.9)  | 68,520<br>(36.18) | 71,696<br>(37.99) | 71,267<br>(37.8)  | 70,502<br>(37.4)<br>74.2  |
| INS                                                                                                                                    | 17,485<br>(10.17)<br>41.9 | 18,828<br>(10.84) | 19,710<br>(11.22) | 21,026<br>(11.84) | 22,508<br>(12.54) | 24,172<br>(13.31) | 25,743<br>(13.99) | 27,294<br>(14.65) | 28,821<br>(15.27) | 29,712<br>(15.63) | 30,454<br>(15.98) | 30,489<br>(16.04) | 30,370<br>(16.04) | 30,305<br>(16.06) | 30,571<br>(16.22) | 30,848<br>(16.36)<br>32.5 |
| SU                                                                                                                                     | 22,286<br>(12.97)<br>53.4 | 22,527<br>(12.97) | 23,287<br>(13.25) | 23,948<br>(13.48) | 25,274<br>(14.08) | 26,138<br>(14.39) | 26,440<br>(14.37) | 26,398<br>(14.17) | 26,293<br>(13.93) | 25,296<br>(13.31) | 23,592<br>(12.38) | 21,846<br>(11.49) | 19,170<br>(10.12) | 16,351<br>(8.66)  | 14,101<br>(7.48)  | 12,465<br>(6.61)<br>13.1  |
| GLP-1                                                                                                                                  | -                         | -                 | -                 | -                 | -                 | -                 | -                 | -                 | 142<br>(0.08)     | 869<br>(0.46)     | 2,467<br>(1.3)    | 6,944<br>(3.66)   | 9,767<br>(5.16)   | 11,342<br>(6.01)  | 11,701<br>(6.21)  | 11,492<br>(6.1)<br>12.1   |
| DPP-4 I                                                                                                                                | -                         | -                 | -                 | -                 | -                 | -                 | -                 | -                 | 1,360<br>(0.72)   | 3,628<br>(1.91)   | 4,172<br>(2.19)   | 5,075<br>(2.67)   | 5,562<br>(2.94)   | 5,808<br>(3.08)   | 6,219<br>(3.3)    | 6,729<br>(3.57)<br>7.1    |
| MET + DPP-4 I                                                                                                                          | -                         | -                 | -                 | -                 | -                 | -                 | -                 | -                 | -                 | 552<br>(0.19)     | 2,142<br>(1.13)   | 3,707<br>(1.95)   | 5,109<br>(2.7)    | 6,004<br>(3.18)   | 6,690<br>(3.18)   | 7,425<br>(3.94)<br>7.8    |
| SGLT-2 I                                                                                                                               | -                         | -                 | -                 | -                 | -                 | -                 | -                 | -                 | -                 | -                 | -                 | -                 | -                 | 14<br>(0.01)      | 1,214<br>(0.64)   | 2,737<br>(1.45)<br>2.9    |
| MEGLI                                                                                                                                  | 1,156<br>(0.67)<br>2.8    | 1,426<br>(0.82)   | 1,497<br>(0.85)   | 1,464<br>(0.82)   | 1,423<br>(0.79)   | 1,199<br>(0.66)   | 1,080<br>(0.59)   | 978<br>(0.53)     | 858<br>(0.45)     | 750<br>(0.39)     | 589<br>(0.31)     | 512<br>(0.27)     | 384<br>(0.2)      | 299<br>(0.16)     | 265<br>(0.14)     | 212<br>(0.11)<br>0.2      |
| A-GLU                                                                                                                                  | 918<br>(0.53)<br>2.2      | 742<br>(0.43)     | 658<br>(0.37)     | 511<br>(0.29)     | 442<br>(0.25)     | 365<br>(0.2)      | 305<br>(0.17)     | 266<br>(0.14)     | 212<br>(0.11)     | 210<br>(0.11)     | 174<br>(0.09)     | 147<br>(0.08)     | 115<br>(0.06)     | 107<br>(0.06)     | 91<br>(0.05)      | 67<br>(0.04)<br>0.07      |
| GLITZ                                                                                                                                  | -                         | 69<br>(0.04)      | 430<br>(0.24)     | 504<br>(0.28)     | 521<br>(0.29)     | 609<br>(0.34)     | 633<br>(0.34)     | 743<br>(0.4)      | 846<br>(0.45)     | 722<br>(0.38)     | 630<br>(0.33)     | 472<br>(0.25)     | 162<br>(0.09)     | 136<br>(0.07)     | 108<br>(0.06)     | 82<br>(0.04)<br>0.09      |
| MET + SGLT-2 I                                                                                                                         | -                         | -                 | -                 | -                 | -                 | -                 | -                 | -                 | -                 | -                 | -                 | -                 | -                 | -                 | -                 | 74<br>(0.04)<br>0.08      |
| MET + GLITZ                                                                                                                            | -                         | -                 | -                 | -                 | 1<br>(0)          | 441<br>(0.24)     | 1,001<br>(0.54)   | 1,739<br>(0.93)   | 2,226<br>(1.18)   | 1,880<br>(0.99)   | 1,574<br>(0.83)   | 1,249<br>(0.66)   | 38<br>(0.02)      | -                 | -                 | -                         |

**Abbreviations:** MET, metformin; INS, insulin; SU, sulfonylurea; GLP-1, glucagon-like peptide 1 agonist; DPP-4 I, dipeptidylpeptidase 4 inhibitors; MET, DPP-4 I, combination formula (metformin + dipeptidylpeptidase 4 inhibitor); SGLT-2 I, sodium glucose co-transporter 2 inhibitors; MEGLI, meglitinides; A-GLU, alpha glucosidase inhibitors; GLITZ, thiazolidinedione; MET + SGLT-2 I, combination formula (metformin + sodium glucose co-transporter 2 inhibitors); MET + GLITZ, combination formula (metformin + thiazolidinedione).

Percentage of patients prescribed different therapies is shown for the first year 1999 and last year 2014.

Note that the number of patients prescribed different therapies in a given year is higher than the total number of glucose-lowering drug users that year due to possibility of polypharmacy and drug-shifters.



| <b>Table S8: Annual prevalence of glucose-lowering drug users in Denmark (per 1,000 inhabitants), 1999-2014, age-group 65-79 years</b> |                                  |                   |                   |                   |                   |                   |                   |                   |                   |                   |                   |                    |                    |                    |                    |                                  |
|----------------------------------------------------------------------------------------------------------------------------------------|----------------------------------|-------------------|-------------------|-------------------|-------------------|-------------------|-------------------|-------------------|-------------------|-------------------|-------------------|--------------------|--------------------|--------------------|--------------------|----------------------------------|
|                                                                                                                                        | 1999                             | 2000              | 2001              | 2002              | 2003              | 2004              | 2005              | 2006              | 2007              | 2008              | 2009              | 2010               | 2011               | 2012               | 2013               | 2014                             |
| TOTAL                                                                                                                                  | 32,654<br>(56.13)<br><i>100</i>  | 34,303<br>(58.98) | 35,873<br>(62.04) | 37,834<br>(65.46) | 40,616<br>(69.86) | 43,691<br>(74.53) | 46,539<br>(78.66) | 49,706<br>(82.82) | 53,672<br>(87.95) | 58,834<br>(93.68) | 64,056<br>(98.75) | 70,559<br>(104.48) | 79,090<br>(112.14) | 86,259<br>(116.93) | 90,220<br>(117.61) | 93,094<br>(117.57)<br><i>100</i> |
| MET                                                                                                                                    | 8,128<br>(13.97)<br><i>24.9</i>  | 10,144<br>(17.44) | 12,014<br>(20.78) | 14,222<br>(24.61) | 16,946<br>(29.15) | 20,220<br>(34.49) | 23,080<br>(39.01) | 26,508<br>(44.17) | 31,011<br>(50.82) | 36,872<br>(58.71) | 43,168<br>(66.55) | 50,426<br>(74.67)  | 59,743<br>(84.71)  | 66,786<br>(90.53)  | 69,835<br>(91.04)  | 71,646<br>(90.48)<br><i>77.0</i> |
| INS                                                                                                                                    | 9,590<br>(16.49)<br><i>29.4</i>  | 10,287<br>(17.69) | 10,864<br>(18.79) | 11,743<br>(20.32) | 12,822<br>(22.06) | 13,969<br>(23.83) | 15,089<br>(25.5)  | 16,166<br>(26.93) | 17,327<br>(28.39) | 18,440<br>(29.36) | 19,503<br>(30.07) | 20,841<br>(30.86)  | 21,947<br>(31.12)  | 23,431<br>(31.76)  | 24,692<br>(32.19)  | 25,892<br>(32.7)<br><i>27.8</i>  |
| SU                                                                                                                                     | 22,974<br>(39.49)<br><i>70.4</i> | 23,194<br>(39.88) | 23,407<br>(40.48) | 23,574<br>(40.79) | 24,362<br>(41.91) | 24,995<br>(42.64) | 25,337<br>(42.83) | 25,264<br>(42.09) | 25,473<br>(41.74) | 25,418<br>(40.47) | 24,734<br>(38.13) | 23,921<br>(35.42)  | 22,575<br>(32.01)  | 20,596<br>(27.92)  | 18,588<br>(24.23)  | 16,528<br>(20.87)<br><i>17.8</i> |
| GLP-1                                                                                                                                  | -                                | -                 | -                 | -                 | -                 | -                 | -                 | -                 | 17<br>(0.03)      | 206<br>(0.33)     | 734<br>(1.13)     | 2,779<br>(4.11)    | 4,457<br>(6.32)    | 5,844<br>(7.92)    | 6,675<br>(8.7)     | 7,171<br>(9.06)<br><i>7.7</i>    |
| DPP-4 I                                                                                                                                | -                                | -                 | -                 | -                 | -                 | -                 | -                 | -                 | 745<br>(1.22)     | 2,121<br>(3.38)   | 2,743<br>(4.23)   | 3,847<br>(5.7)     | 4,919<br>(6.97)    | 5,700<br>(7.73)    | 6,730<br>(8.77)    | 7,981<br>(10.08)<br><i>8.6</i>   |
| MET +<br>DPP-4 I                                                                                                                       | -                                | -                 | -                 | -                 | -                 | -                 | -                 | -                 | -                 | 304<br>(0.48)     | 1,240<br>(1.91)   | 2,509<br>(3.72)    | 3,792<br>(5.38)    | 4,797<br>(6.5)     | 5,809<br>(7.57)    | 6,649<br>(8.39)<br><i>7.1</i>    |
| SGLT-2 I                                                                                                                               | -                                | -                 | -                 | -                 | -                 | -                 | -                 | -                 | -                 | -                 | -                 | -                  | -                  | 6<br>(0.01)        | 633<br>(0.83)      | 1397<br>(1.76)<br><i>1.5</i>     |
| MEGLI                                                                                                                                  | 788<br>(1.35)<br><i>2.4</i>      | 938<br>(1.61)     | 999<br>(1.73)     | 1040<br>(1.8)     | 1069<br>(1.84)    | 942<br>(1.61)     | 873<br>(1.48)     | 807<br>(1.34)     | 777<br>(1.27)     | 736<br>(1.17)     | 680<br>(1.05)     | 619<br>(0.92)      | 528<br>(0.75)      | 453<br>(0.61)      | 435<br>(0.57)      | 417<br>(0.53)<br><i>0.4</i>      |
| A-GLU                                                                                                                                  | 949<br>(1.63)<br><i>2.9</i>      | 838<br>(1.44)     | 713<br>(1.23)     | 548<br>(0.95)     | 481<br>(0.83)     | 409<br>(0.7)      | 356<br>(0.6)      | 307<br>(0.51)     | 270<br>(0.44)     | 233<br>(0.37)     | 202<br>(0.31)     | 184<br>(0.27)      | 168<br>(0.24)      | 157<br>(0.21)      | 128<br>(0.17)      | 52<br>(0.07)<br><i>0.06</i>      |
| GLITZ                                                                                                                                  | -                                | 27<br>(0.05)      | 239<br>(0.41)     | 249<br>(0.43)     | 256<br>(0.44)     | 320<br>(0.55)     | 407<br>(0.69)     | 487<br>(0.81)     | 524<br>(0.86)     | 479<br>(0.76)     | 499<br>(0.77)     | 419<br>(0.62)      | 115<br>(0.16)      | 90<br>(0.12)       | 83<br>(0.11)       | 52<br>(0.07)<br><i>0.06</i>      |
| MET +<br>SGLT-2 I                                                                                                                      | -                                | -                 | -                 | -                 | -                 | -                 | -                 | -                 | -                 | -                 | -                 | -                  | -                  | -                  | -                  | 41<br>(0.05)<br><i>0.04</i>      |
| MET +<br>GLITZ                                                                                                                         | -                                | -                 | -                 | -                 | -                 | 234<br>(0.4)      | 478<br>(0.81)     | 939<br>(1.56)     | 1,215<br>(1.99)   | 1,138<br>(1.81)   | 1,099<br>(1.69)   | 1,006<br>(1.49)    | 38<br>(0.05)       | -                  | -                  | -                                |

**Notes:** The percentage of patients prescribed different therapies is shown for the first year 1999 and for last year 2014 (written in italics)  
The number of patients prescribed different therapies in a given year is higher than the total number of glucose-lowering drug users that year due to possibility of polypharmacy and drug-shifters  
**Abbreviations:** MET, metformin; INS, insulin; SU, sulfonylureas; GLP-1, glucagon-like peptide 1 agonists; DPP-4 I, dipeptidylpeptidase 4 inhibitors; MET + DPP-4 I, combination formula with metformin + dipeptidylpeptidase 4 inhibitor; SGLT-2 I, sodium glucose co-transporter 2 inhibitors; MEGLI, meglitinides; A-GLU, alfa glucosidase inhibitors; GLITZ, thiazolidinediones; MET + SGLT-2 I, combination formula with metformin + sodium glucose co-transporter 2 inhibitors); MET + GLITZ, combination formula with metformin + thiazolidinediones.

| <b>Table S9: Annual prevalence of glucose-lowering drug users in Denmark (per 1,000 inhabitants), 1999-2014, age-group ≥ 80 years</b> |                                 |                   |                   |                   |                   |                   |                   |                   |                   |                   |                   |                   |                   |                    |                    |                                  |
|---------------------------------------------------------------------------------------------------------------------------------------|---------------------------------|-------------------|-------------------|-------------------|-------------------|-------------------|-------------------|-------------------|-------------------|-------------------|-------------------|-------------------|-------------------|--------------------|--------------------|----------------------------------|
|                                                                                                                                       | 1999                            | 2000              | 2001              | 2002              | 2003              | 2004              | 2005              | 2006              | 2007              | 2008              | 2009              | 2010              | 2011              | 2012               | 2013               | 2014                             |
| TOTAL                                                                                                                                 | 11,986<br>(57.42)<br><i>100</i> | 12,480<br>(59.76) | 13,352<br>(62.52) | 13,904<br>(64.2)  | 14,649<br>(67.51) | 15,450<br>(70.75) | 16,442<br>(74.44) | 17,223<br>(77.29) | 18,103<br>(80.63) | 19,108<br>(84.91) | 20,167<br>(88.9)  | 21,267<br>(93.48) | 22,706<br>(99.37) | 23,904<br>(103.77) | 24,621<br>(105.81) | 25,390<br>(108.09)<br><i>100</i> |
| MET                                                                                                                                   | 1,879<br>(9)<br><i>15.7</i>     | 2,256<br>(10.8)   | 2,685<br>(12.57)  | 3,191<br>(14.73)  | 3,730<br>(17.19)  | 4,377<br>(20.04)  | 5,049<br>(22.86)  | 5,790<br>(25.98)  | 6,916<br>(30.8)   | 8,215<br>(36.5)   | 9,724<br>(42.86)  | 11,214<br>(49.29) | 13,271<br>(58.08) | 15,026<br>(65.23)  | 15,875<br>(68.23)  | 16,739<br>(71.26)<br><i>65.9</i> |
| INS                                                                                                                                   | 2,873<br>(13.76)<br><i>24.0</i> | 3,113<br>(14.91)  | 3,369<br>(15.77)  | 3,667<br>(16.93)  | 3,949<br>(18.2)   | 4,330<br>(19.83)  | 4,697<br>(21.27)  | 4,989<br>(22.39)  | 5,305<br>(23.63)  | 5,572<br>(24.76)  | 5,952<br>(26.24)  | 6,188<br>(27.2)   | 6,457<br>(28.26)  | 6,647<br>(28.85)   | 7,001<br>(30.09)   | 7,323<br>(31.18)<br><i>28.8</i>  |
| SU                                                                                                                                    | 9,284<br>(44.47)<br><i>77.5</i> | 9,489<br>(45.44)  | 9,986<br>(46.76)  | 10,138<br>(46.81) | 10,461<br>(48.21) | 10,591<br>(48.5)  | 10,818<br>(48.98) | 10,807<br>(48.5)  | 10,822<br>(48.2)  | 10,559<br>(46.92) | 10,130<br>(44.65) | 9,702<br>(42.64)  | 8,891<br>(38.91)  | 7,883<br>(34.22)   | 6,856<br>(29.46)   | 5,919<br>(25.2)<br><i>23.3</i>   |
| GLP-1                                                                                                                                 | -                               | -                 | -                 | -                 | -                 | -                 | -                 | -                 | 1<br>(0)          | 4<br>(0.02)       | 24<br>(0.1)       | 120<br>(0.53)     | 199<br>(0.87)     | 245<br>(1.07)      | 311<br>(1.32)      | 377<br>(1.61)<br><i>1.5</i>      |
| DPP-4 I                                                                                                                               | -                               | -                 | -                 | -                 | -                 | -                 | -                 | -                 | 111<br>(0.49)     | 342<br>(1.52)     | 534<br>(2.35)     | 779<br>(3.42)     | 1,079<br>(4.72)   | 1,351<br>(5.86)    | 1,835<br>(7.89)    | 2,381<br>(10.14)<br><i>9.4</i>   |
| MET + DPP-4 I                                                                                                                         | -                               | -                 | -                 | -                 | -                 | -                 | -                 | -                 | -                 | 45<br>(0.2)       | 164<br>(0.72)     | 370<br>(1.63)     | 530<br>(2.32)     | 668<br>(2.9)       | 843<br>(3.61)      | 977<br>(4.12)<br><i>3.8</i>      |
| SGLT-2 I                                                                                                                              | -                               | -                 | -                 | -                 | -                 | -                 | -                 | -                 | -                 | -                 | -                 | -                 | -                 | -                  | 41<br>(0.18)       | 103<br>(0.43)<br><i>0.4</i>      |
| MEGLI                                                                                                                                 | 142<br>(0.68)<br><i>1.2</i>     | 177<br>(0.85)     | 206<br>(0.96)     | 224<br>(1.03)     | 249<br>(1.15)     | 244<br>(1.12)     | 233<br>(1.05)     | 221<br>(0.99)     | 210<br>(0.94)     | 208<br>(0.92)     | 207<br>(0.91)     | 189<br>(0.83)     | 182<br>(0.8)      | 163<br>(0.71)      | 159<br>(0.68)      | 144<br>(0.61)<br><i>0.6</i>      |
| A-GLU                                                                                                                                 | 296<br>(1.42)<br><i>2.5</i>     | 271<br>(1.3)      | 246<br>(1.15)     | 221<br>(1.02)     | 178<br>(0.82)     | 169<br>(0.77)     | 145<br>(0.66)     | 134<br>(0.6)      | 120<br>(0.53)     | 114<br>(0.51)     | 92<br>(0.41)      | 74<br>(0.33)      | 58<br>(0.25)      | 50<br>(0.22)       | 40<br>(0.17)       | 28<br>(0.12)<br><i>0.1</i>       |
| GLITZ                                                                                                                                 | -                               | 3<br>(0.01)       | 38<br>(0.18)      | 38<br>(0.18)      | 51<br>(0.24)      | 55<br>(0.25)      | 65<br>(0.29)      | 105<br>(0.47)     | 132<br>(0.59)     | 107<br>(0.48)     | 102<br>(0.45)     | 83<br>(0.36)      | 23<br>(0.1)       | 19<br>(0.08)       | 16<br>(0.07)       | 13<br>(0.06)<br><i>0.05</i>      |
| MET + SGLT-2 I                                                                                                                        | -                               | -                 | -                 | -                 | -                 | -                 | -                 | -                 | -                 | -                 | -                 | -                 | -                 | -                  | -                  | 3<br>(0.01)<br><i>0.01</i>       |
| MET + GLITZ                                                                                                                           | -                               | -                 | -                 | -                 | -                 | 33<br>(0.15)      | 65<br>(0.29)      | 112<br>(0.5)      | 173<br>(0.77)     | 154<br>(0.68)     | 166<br>(0.73)     | 148<br>(0.65)     | 9<br>(0.04)       | -                  | -                  | -                                |

**Notes:** The percentage of patients prescribed different therapies is shown for the first year 1999 and for last year 2014 (written in italics)  
The number of patients prescribed different therapies in a given year is higher than the total number of glucose-lowering drug users that year due to possibility of polypharmacy and drug-shifters  
**Abbreviations:** MET, metformin; INS, insulin; SU, sulfonylureas; GLP-1, glucagon-like peptide 1 agonists; DPP-4 I, dipeptidylpeptidase 4 inhibitors; MET + DPP-4 I, combination formula with metformin + dipeptidylpeptidase 4 inhibitor; SGLT-2 I, sodium glucose co-transporter 2 inhibitors; MEGLI, meglitinides; A-GLU, alfa glucosidase inhibitors; GLITZ, thiazolidinediones; MET + SGLT-2 I, combination formula with metformin + sodium glucose co-transporter 2 inhibitors); MET + GLITZ, combination formula with metformin + thiazolidinediones.

| <b>Table S10: Annual prevalence of insulin users in Denmark (per 1,000 inhabitants), 1999-2014, age-group &lt; 20 years</b>                                                                                                                                                                                                                                                                                                                                                                                                                                                               |                                |                 |                 |                 |                 |                 |                 |                 |                 |                 |                 |                 |                 |                 |                 |                                |
|-------------------------------------------------------------------------------------------------------------------------------------------------------------------------------------------------------------------------------------------------------------------------------------------------------------------------------------------------------------------------------------------------------------------------------------------------------------------------------------------------------------------------------------------------------------------------------------------|--------------------------------|-----------------|-----------------|-----------------|-----------------|-----------------|-----------------|-----------------|-----------------|-----------------|-----------------|-----------------|-----------------|-----------------|-----------------|--------------------------------|
|                                                                                                                                                                                                                                                                                                                                                                                                                                                                                                                                                                                           | <b>1999</b>                    | <b>2000</b>     | <b>2001</b>     | <b>2002</b>     | <b>2003</b>     | <b>2004</b>     | <b>2005</b>     | <b>2006</b>     | <b>2007</b>     | <b>2008</b>     | <b>2009</b>     | <b>2010</b>     | <b>2011</b>     | <b>2012</b>     | <b>2013</b>     | <b>2014</b>                    |
| INS                                                                                                                                                                                                                                                                                                                                                                                                                                                                                                                                                                                       | 2,029<br>(6.79)<br><i>100</i>  | 2,082<br>(6.93) | 2,142<br>(7.04) | 2,238<br>(7.22) | 2,328<br>(7.38) | 2,496<br>(7.78) | 2,642<br>(8.08) | 2,751<br>(8.28) | 2,853<br>(8.48) | 2,971<br>(8.74) | 3,068<br>(8.94) | 3,174<br>(9.21) | 3,277<br>(9.49) | 3,363<br>(9.73) | 3,415<br>(9.94) | 3,430<br>(10.02)<br><i>100</i> |
| LONG                                                                                                                                                                                                                                                                                                                                                                                                                                                                                                                                                                                      | 1<br>(0)<br><i>0.05</i>        | 2<br>(0)        | -               | -               | -               | 200<br>(0.64)   | 593<br>(1.85)   | 1,035<br>(3.14) | 1,364<br>(4.07) | 1,823<br>(5.37) | 1,906<br>(5.56) | 1,863<br>(5.39) | 1,805<br>(5.19) | 1,721<br>(4.95) | 1,617<br>(4.67) | 1,627<br>(4.71)<br><i>47.4</i> |
| FAST                                                                                                                                                                                                                                                                                                                                                                                                                                                                                                                                                                                      | 1,646<br>(5.55)<br><i>81.1</i> | 1,785<br>(5.98) | 1,862<br>(6.15) | 1,964<br>(6.35) | 2,101<br>(6.68) | 2,279<br>(7.1)  | 2,447<br>(7.5)  | 2,563<br>(7.72) | 2,713<br>(8.06) | 2,861<br>(8.41) | 2,977<br>(8.69) | 3,105<br>(9.02) | 3,219<br>(9.32) | 3,303<br>(9.57) | 3,363<br>(9.79) | 3,374<br>(9.86)<br><i>98.4</i> |
| INTERM                                                                                                                                                                                                                                                                                                                                                                                                                                                                                                                                                                                    | 1,137<br>(3.89)<br><i>56.0</i> | 1,109<br>(3.81) | 1,078<br>(3.7)  | 1,132<br>(3.8)  | 1,195<br>(3.94) | 1,229<br>(3.94) | 1,218<br>(3.8)  | 1,134<br>(3.42) | 1,046<br>(3.11) | 922<br>(2.71)   | 720<br>(2.1)    | 646<br>(1.88)   | 609<br>(1.77)   | 609<br>(1.77)   | 560<br>(1.65)   | 492<br>(1.44)<br><i>14.3</i>   |
| MIXED                                                                                                                                                                                                                                                                                                                                                                                                                                                                                                                                                                                     | 1,329<br>(4.37)<br><i>65.5</i> | 1,456<br>(4.73) | 1,570<br>(5.01) | 1,690<br>(5.32) | 1,804<br>(5.58) | 1,942<br>(5.93) | 1,949<br>(5.85) | 1,812<br>(5.38) | 1,566<br>(4.63) | 900<br>(2.64)   | 299<br>(0.88)   | 183<br>(0.52)   | 117<br>(0.33)   | 90<br>(0.25)    | 64<br>(0.18)    | 51<br>(0.15)<br><i>1.5</i>     |
| <p><b>Notes:</b> The percentage of patients prescribed different insulin subtypes is shown for the first year 1999 and last year 2014 (written in italics). The number of patients prescribed different insulin subtypes in a given year is higher than the total number of insulin users that year due to possibility of polypharmacy and drug-shifters.</p> <p><b>Abbreviations:</b> INS, insulin; LONG, long-acting insulin; FAST, fast-acting insulin; INTERM, intermediate-acting insulin; MIXED, combination formula (intermediate-/long-acting insulin + fast-acting insulin).</p> |                                |                 |                 |                 |                 |                 |                 |                 |                 |                 |                 |                 |                 |                 |                 |                                |

**Table S11: Annual prevalence of insulin users in Denmark (per 1,000 inhabitants), 1999-2014, age-group 20-39 years**

|        | 1999                           | 2000            | 2001            | 2002            | 2003            | 2004            | 2005            | 2006            | 2007            | 2008            | 2009            | 2010            | 2011            | 2012            | 2013            | 2014                           |
|--------|--------------------------------|-----------------|-----------------|-----------------|-----------------|-----------------|-----------------|-----------------|-----------------|-----------------|-----------------|-----------------|-----------------|-----------------|-----------------|--------------------------------|
| INS    | 8,457<br>(5.46)<br><i>100</i>  | 8,498<br>(5.52) | 8,384<br>(5.49) | 8,422<br>(5.58) | 8,453<br>(5.67) | 8,393<br>(5.73) | 8,335<br>(5.8)  | 8,315<br>(5.89) | 8,310<br>(5.99) | 8,313<br>(6.03) | 8,287<br>(6.01) | 8,217<br>(5.96) | 8,149<br>(5.9)  | 8,159<br>(5.91) | 8,231<br>(5.96) | 8,351<br>(6.01)<br><i>100</i>  |
| LONG   | 3<br>(0)<br><i>0.04</i>        | 2<br>(0)        | -<br>-          | -<br>-          | -<br>-          | 706<br>(0.48)   | 1,914<br>(1.33) | 2,540<br>(1.8)  | 3,054<br>(2.2)  | 3,952<br>(2.87) | 4,552<br>(3.3)  | 4,923<br>(3.57) | 5,149<br>(3.73) | 5,285<br>(3.83) | 5,430<br>(3.93) | 5,607<br>(4.03)<br><i>67.1</i> |
| FAST   | 7,395<br>(4.77)<br><i>87.4</i> | 7,476<br>(4.85) | 7,284<br>(4.77) | 7,406<br>(4.9)  | 7,361<br>(4.94) | 7,328<br>(5.01) | 7,250<br>(5.05) | 7,241<br>(5.13) | 7,189<br>(5.18) | 7,203<br>(5.23) | 7,105<br>(5.15) | 7,126<br>(5.17) | 7,071<br>(5.12) | 7,075<br>(5.13) | 7,138<br>(5.17) | 7,278<br>(5.24)<br><i>87.2</i> |
| INTERM | 7,709<br>(4.98)<br><i>91.1</i> | 7,692<br>(4.99) | 7,230<br>(4.74) | 7,463<br>(4.94) | 7,363<br>(4.94) | 6,929<br>(4.73) | 6,145<br>(4.28) | 5,381<br>(3.81) | 4,808<br>(3.46) | 3,982<br>(2.89) | 3,178<br>(2.3)  | 2,574<br>(1.87) | 2,113<br>(1.53) | 1,817<br>(1.32) | 1,660<br>(1.2)  | 1,412<br>(1.02)<br><i>16.9</i> |
| MIXED  | 1,090<br>(0.7)<br><i>12.9</i>  | 1,074<br>(0.7)  | 1,075<br>(0.7)  | 1,069<br>(0.71) | 1,117<br>(0.75) | 1,084<br>(0.74) | 1,040<br>(0.72) | 1,035<br>(0.73) | 1,048<br>(0.76) | 1,002<br>(0.73) | 936<br>(0.68)   | 780<br>(0.57)   | 690<br>(0.5)    | 618<br>(0.45)   | 609<br>(0.44)   | 568<br>(0.41)<br><i>6.8</i>    |

**Notes:** The percentage of patients prescribed different insulin subtypes is shown for the first year 1999 and last year 2014 (written in italics). The number of patients prescribed different insulin subtypes in a given year is higher than the total number of insulin users that year due to possibility of polypharmacy and drug-shifters.

**Abbreviations:** INS, insulin; LONG, long-acting insulin; FAST, fast-acting insulin; INTERM, intermediate-acting insulin; MIXED, combination formula (intermediate-/long-acting insulin + fast-acting insulin).

**Table S12: Annual prevalence of insulin users in Denmark (per 1,000 inhabitants), 1999-2014, age-group 40-64 years**

|        | 1999                            | 2000              | 2001              | 2002              | 2003              | 2004              | 2005              | 2006              | 2007              | 2008              | 2009              | 2010              | 2011              | 2012              | 2013              | 2014                            |
|--------|---------------------------------|-------------------|-------------------|-------------------|-------------------|-------------------|-------------------|-------------------|-------------------|-------------------|-------------------|-------------------|-------------------|-------------------|-------------------|---------------------------------|
| INS    | 17,485<br>(10.17)<br><i>100</i> | 18,828<br>(10.84) | 19,710<br>(11.22) | 21,026<br>(11.84) | 22,508<br>(12.54) | 24,172<br>(13.31) | 25,743<br>(13.99) | 27,294<br>(14.65) | 28,821<br>(15.27) | 29,712<br>(15.63) | 30,454<br>(15.98) | 30,489<br>(16.04) | 30,370<br>(16.04) | 30,305<br>(16.06) | 30,571<br>(16.22) | 30,848<br>(16.36)<br><i>100</i> |
| LONG   | 3<br>(0)<br><i>0.02</i>         | 5<br>(0)          | -<br>-            | -<br>-            | -<br>-            | 1,325<br>(0.73)   | 3,612<br>(1.96)   | 4,889<br>(2.62)   | 6,017<br>(3.19)   | 8,981<br>(4.73)   | 11,784<br>(6.18)  | 13,363<br>(7.03)  | 14,682<br>(7.75)  | 15,736<br>(8.34)  | 16,433<br>(8.72)  | 17,557<br>(9.31)<br><i>56.9</i> |
| FAST   | 10,096<br>(5.88)<br><i>57.7</i> | 10,693<br>(6.16)  | 11,030<br>(6.28)  | 11,745<br>(6.61)  | 12,301<br>(6.85)  | 12,722<br>(7)     | 13,311<br>(7.23)  | 13,971<br>(7.5)   | 14,654<br>(7.76)  | 15,129<br>(7.96)  | 15,628<br>(8.2)   | 15,907<br>(8.37)  | 15,983<br>(8.44)  | 16,197<br>(8.58)  | 16,478<br>(8.74)  | 16,715<br>(8.87)<br><i>54.2</i> |
| INTERM | 15,026<br>(8.74)<br><i>85.9</i> | 16,118<br>(9.28)  | 16,380<br>(9.32)  | 17,651<br>(9.94)  | 18,393<br>(10.25) | 18,608<br>(10.24) | 17,904<br>(9.73)  | 17,003<br>(9.13)  | 16,349<br>(8.66)  | 14,692<br>(7.73)  | 12,588<br>(6.61)  | 11,075<br>(5.82)  | 9,780<br>(5.16)   | 8,985<br>(4.76)   | 8,692<br>(4.61)   | 8,159<br>(4.33)<br><i>26.4</i>  |
| MIXED  | 4,328<br>(2.52)<br><i>24.8</i>  | 4,727<br>(2.72)   | 5,020<br>(2.86)   | 5,457<br>(3.07)   | 6,162<br>(3.43)   | 7,169<br>(3.95)   | 7,831<br>(4.26)   | 8,678<br>(4.66)   | 9,634<br>(5.1)    | 9,614<br>(5.06)   | 9,043<br>(4.74)   | 8,233<br>(4.33)   | 7,362<br>(3.89)   | 6,598<br>(3.5)    | 5,961<br>(3.16)   | 5,410<br>(2.87)<br><i>17.5</i>  |

**Notes:** The percentage of patients prescribed different insulin subtypes is shown for the first year 1999 and last year 2014 (written in italics). The number of patients prescribed different insulin subtypes in a given year is higher than the total number of insulin users that year due to possibility of polypharmacy and drug-shifters.

**Abbreviations:** INS, insulin; LONG, long-acting insulin; FAST, fast-acting insulin; INTERM, intermediate-acting insulin; MIXED, combination formula (intermediate-/long-acting insulin + fast-acting insulin).

**Table S13: Annual prevalence of insulin users in Denmark (per 1,000 inhabitants), 1999-2014, age-group 65-79 years**

|        | 1999                            | 2000              | 2001              | 2002              | 2003              | 2004              | 2005             | 2006              | 2007              | 2008              | 2009              | 2010              | 2011              | 2012              | 2013              | 2014                             |
|--------|---------------------------------|-------------------|-------------------|-------------------|-------------------|-------------------|------------------|-------------------|-------------------|-------------------|-------------------|-------------------|-------------------|-------------------|-------------------|----------------------------------|
| INS    | 9,590<br>(16.49)<br><i>100</i>  | 10,287<br>(17.69) | 10,864<br>(18.79) | 11,743<br>(20.32) | 12,822<br>(22.06) | 13,969<br>(23.83) | 15,089<br>(25.5) | 16,166<br>(26.93) | 17,327<br>(28.39) | 18,440<br>(29.36) | 19,503<br>(30.07) | 20,841<br>(30.86) | 21,947<br>(31.12) | 23,431<br>(31.76) | 24,692<br>(32.19) | 25,892<br>(32.7)<br><i>100</i>   |
| LONG   | 1<br>(0)<br><i>0.01</i>         | -                 | -                 | -                 | -                 | 340<br>(0.58)     | 922<br>(1.56)    | 1,265<br>(2.11)   | 1,635<br>(2.68)   | 3,161<br>(5.03)   | 4,817<br>(7.43)   | 6,214<br>(9.2)    | 7,514<br>(10.65)  | 8,959<br>(12.14)  | 10,120<br>(13.19) | 11,667<br>(14.73)<br><i>45.1</i> |
| FAST   | 2,204<br>(3.79)<br><i>23.0</i>  | 2,367<br>(4.07)   | 2,534<br>(4.38)   | 2,854<br>(4.94)   | 3,158<br>(5.43)   | 3,462<br>(5.91)   | 3,794<br>(6.41)  | 4,043<br>(6.74)   | 4,460<br>(7.31)   | 4,882<br>(7.77)   | 5,416<br>(8.35)   | 5,991<br>(8.87)   | 6,467<br>(9.17)   | 7,187<br>(9.74)   | 7,737<br>(10.09)  | 8,545<br>(10.79)<br><i>33.0</i>  |
| INTERM | 7,402<br>(12.72)<br><i>77.2</i> | 7,878<br>(13.55)  | 8,149<br>(14.09)  | 8,843<br>(15.3)   | 9,522<br>(16.38)  | 9,888<br>(16.87)  | 9,919<br>(16.7)  | 9,873<br>(16.45)  | 9,858<br>(16.15)  | 9,592<br>(15.27)  | 8,835<br>(13.62)  | 8,540<br>(12.65)  | 8,224<br>(11.66)  | 8,231<br>(11.16)  | 8,424<br>(10.98)  | 8,335<br>(10.53)<br><i>32.2</i>  |
| MIXED  | 4,110<br>(7.07)<br><i>42.9</i>  | 4,475<br>(7.69)   | 4,826<br>(8.35)   | 5,106<br>(8.83)   | 5,736<br>(9.87)   | 6,395<br>(10.91)  | 7,066<br>(11.94) | 7,713<br>(12.85)  | 8,463<br>(13.87)  | 8,739<br>(13.92)  | 8,568<br>(13.21)  | 8,427<br>(12.48)  | 8,290<br>(11.75)  | 8,166<br>(11.07)  | 7,884<br>(10.28)  | 7,491<br>(9.46)<br><i>28.9</i>   |

**Notes:** The percentage of patients prescribed different insulin subtypes is shown for the first year 1999 and last year 2014 (written in italics). The number of patients prescribed different insulin subtypes in a given year is higher than the total number of insulin users that year due to possibility of polypharmacy and drug-shifters.

**Abbreviations:** INS, insulin; LONG, long-acting insulin; FAST, fast-acting insulin; INTERM, intermediate-acting insulin; MIXED, combination formula (intermediate-/long-acting insulin + fast-acting insulin).

| <b>Table S14: Annual prevalence of insulin users in Denmark (per 1,000 inhabitants), 1999-2014, age-group ≥ 80 years</b>                                                                                                                                                                                                                                                                                                                                                                                                                                                                  |                                 |                  |                  |                  |                  |                  |                  |                  |                  |                  |                  |                  |                  |                  |                  |                                 |
|-------------------------------------------------------------------------------------------------------------------------------------------------------------------------------------------------------------------------------------------------------------------------------------------------------------------------------------------------------------------------------------------------------------------------------------------------------------------------------------------------------------------------------------------------------------------------------------------|---------------------------------|------------------|------------------|------------------|------------------|------------------|------------------|------------------|------------------|------------------|------------------|------------------|------------------|------------------|------------------|---------------------------------|
|                                                                                                                                                                                                                                                                                                                                                                                                                                                                                                                                                                                           | <b>1999</b>                     | <b>2000</b>      | <b>2001</b>      | <b>2002</b>      | <b>2003</b>      | <b>2004</b>      | <b>2005</b>      | <b>2006</b>      | <b>2007</b>      | <b>2008</b>      | <b>2009</b>      | <b>2010</b>      | <b>2011</b>      | <b>2012</b>      | <b>2013</b>      | <b>2014</b>                     |
| INS                                                                                                                                                                                                                                                                                                                                                                                                                                                                                                                                                                                       | 2,873<br>(13.76)<br><i>100</i>  | 3,113<br>(14.91) | 3,369<br>(15.77) | 3,667<br>16.93   | 3,949<br>(18.2)  | 4,330<br>(19.83) | 4,697<br>(21.27) | 4,989<br>(22.39) | 5,305<br>(23.63) | 5,572<br>(24.76) | 5,952<br>(26.24) | 6,188<br>(27.2)  | 6,457<br>(28.26) | 6,647<br>(28.85) | 7,001<br>(30.09) | 7,323<br>(31.18)<br><i>100</i>  |
| LONG                                                                                                                                                                                                                                                                                                                                                                                                                                                                                                                                                                                      | -                               | 1<br>0           | -                | -                | -                | 30<br>(0.14)     | 109<br>(0.49)    | 167<br>(0.75)    | 205<br>(0.91)    | 563<br>(2.5)     | 1,001<br>(4.41)  | 1,286<br>(5.65)  | 1,629<br>(7.13)  | 1,938<br>(8.41)  | 2,228<br>(9.58)  | 2,561<br>(10.9)<br><i>35.0</i>  |
| FAST                                                                                                                                                                                                                                                                                                                                                                                                                                                                                                                                                                                      | 295<br>(1.41)<br><i>10.3</i>    | 349<br>(1.67)    | 396<br>(1.85)    | 420<br>(1.94)    | 477<br>(2.2)     | 562<br>(2.57)    | 651<br>(2.95)    | 706<br>(3.17)    | 750<br>(3.34)    | 851<br>(3.78)    | 1,023<br>(4.51)  | 1,090<br>(4.79)  | 1,253<br>(5.48)  | 1,436<br>(6.23)  | 1,607<br>(6.91)  | 1,806<br>(7.69)<br><i>24.7</i>  |
| INTERM                                                                                                                                                                                                                                                                                                                                                                                                                                                                                                                                                                                    | 2,135<br>(10.23)<br><i>74.3</i> | 2,253<br>(10.79) | 2,446<br>(11.45) | 2,613<br>(12.06) | 2,783<br>(12.83) | 2,977<br>(13.63) | 3,037<br>(13.75) | 3,048<br>(13.68) | 3,085<br>(13.74) | 3,025<br>(13.44) | 2,953<br>(13.02) | 2,841<br>(12.49) | 2,724<br>(11.92) | 2,684<br>(11.65) | 2,710<br>(11.65) | 2,736<br>(11.65)<br><i>37.4</i> |
| MIXED                                                                                                                                                                                                                                                                                                                                                                                                                                                                                                                                                                                     | 1,197<br>(5.73)<br><i>41.7</i>  | 1,362<br>(6.52)  | 1,519<br>(7.11)  | 1,677<br>(7.74)  | 1,863<br>(8.59)  | 2,085<br>(9.55)  | 2,332<br>(10.56) | 2,568<br>(11.52) | 2,825<br>(12.58) | 2,866<br>(12.74) | 2,810<br>(12.39) | 2,794<br>(12.28) | 2,696<br>(11.8)  | 2,607<br>(11.32) | 2,570<br>(11.05) | 2,511<br>(10.69)<br><i>34.3</i> |
| <p><b>Notes:</b> The percentage of patients prescribed different insulin subtypes is shown for the first year 1999 and last year 2014 (written in italics). The number of patients prescribed different insulin subtypes in a given year is higher than the total number of insulin users that year due to possibility of polypharmacy and drug-shifters.</p> <p><b>Abbreviations:</b> INS, insulin; LONG, long-acting insulin; FAST, fast-acting insulin; INTERM, intermediate-acting insulin; MIXED, combination formula (intermediate-/long-acting insulin + fast-acting insulin).</p> |                                 |                  |                  |                  |                  |                  |                  |                  |                  |                  |                  |                  |                  |                  |                  |                                 |

**Figur S1:** Annual prevalence of all glucose-lowering drug-users (a) and insulin users (b) in Denmark per 1,000 inhabitants, 1999-2014, women.

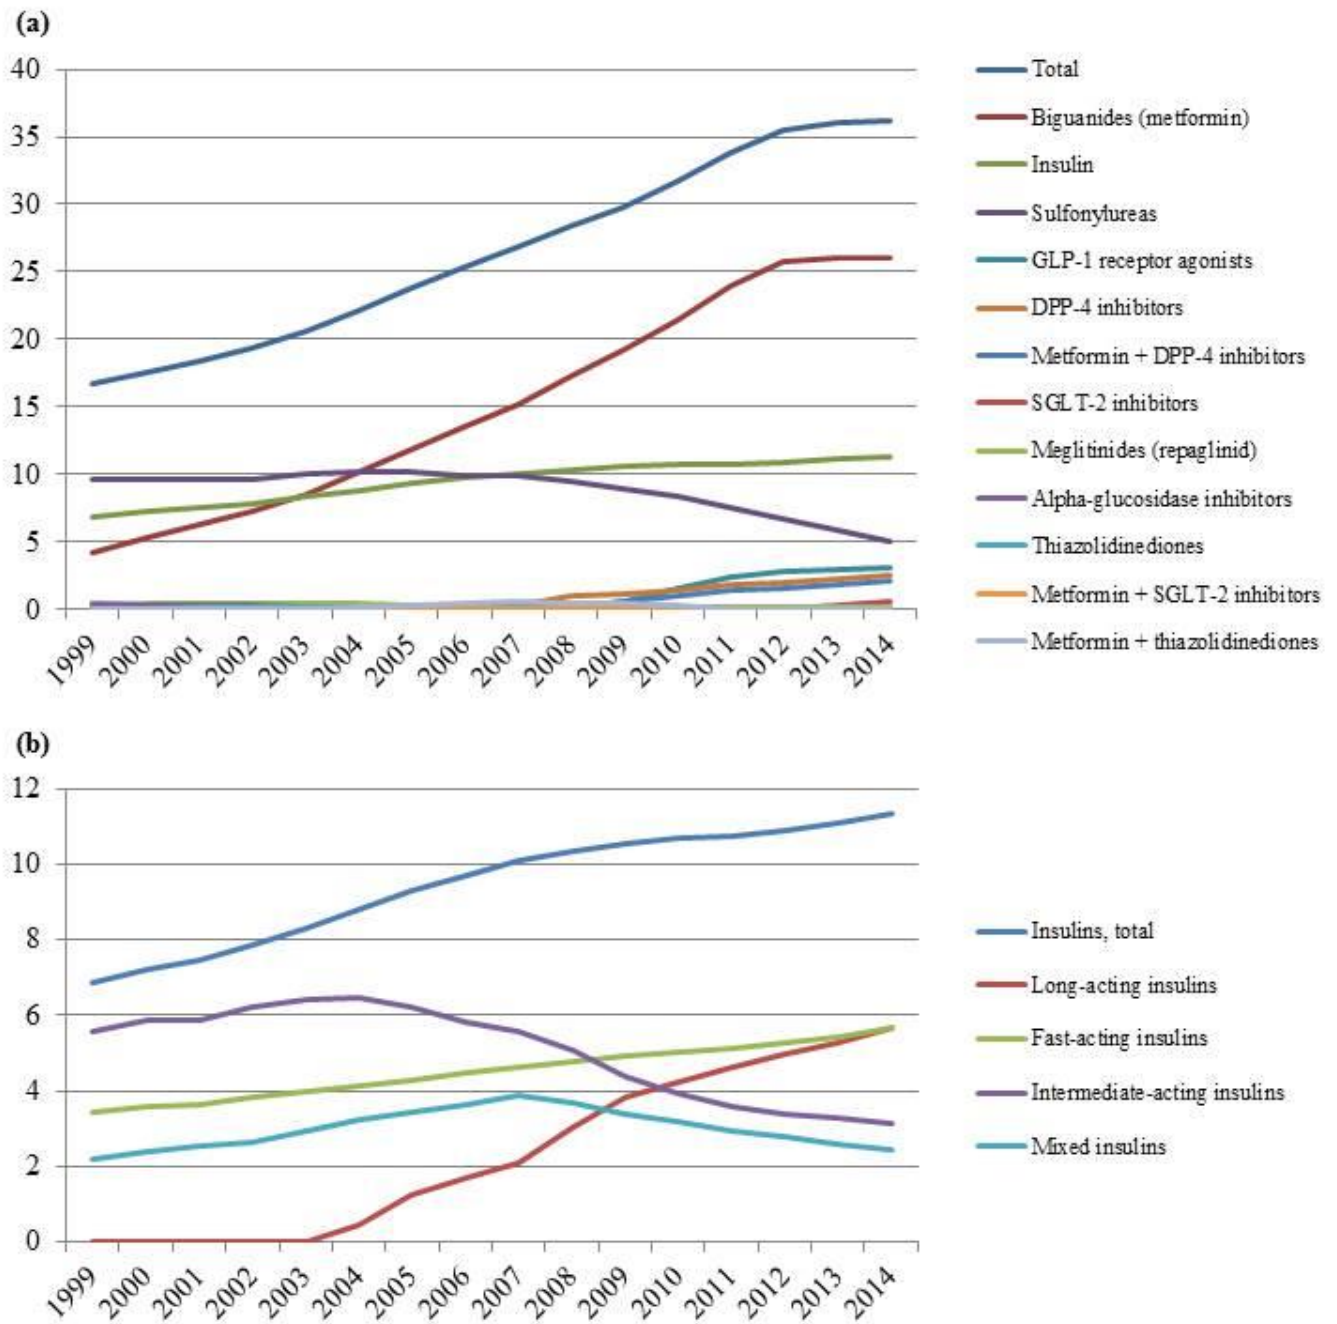

**Notes:** The number of persons prescribed different therapies in a given year is higher than the total number of glucose-lowering drug users that year due to possibility of polypharmacy and drug-shifters.

**Abbreviations:** GLP-1, glucagon-like receptor 1; DPP-4, dipeptidylpeptidase 4; SGLT-2, sodium-glucose co-transporter 2.



**Figur S2:** Annual prevalence of all glucose-lowering drug-users (a) and insulin users (b) in Denmark per 1,000 inhabitants, 1999-2014, men.

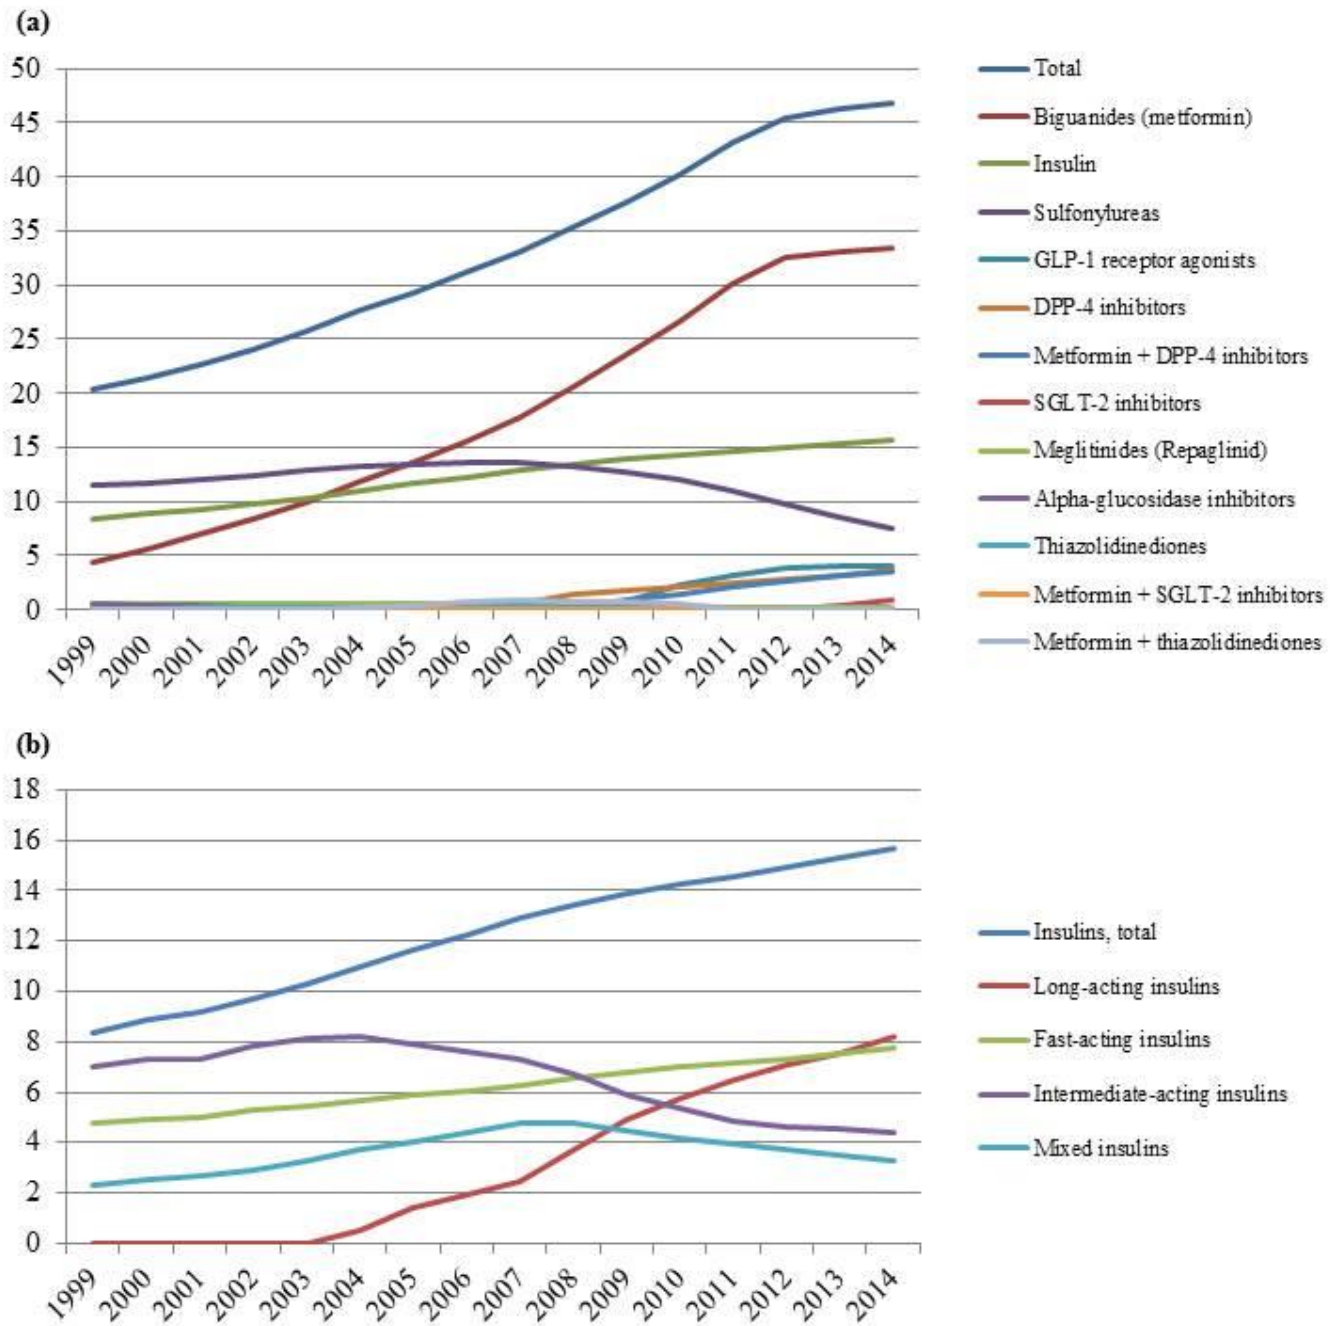

**Notes:** The number of persons prescribed different therapies in a given year is higher than the total number of glucose-lowering drug users that year due to possibility of polypharmacy and drug-shifters.

**Abbreviations:** GLP-1, glucagon-like receptor 1; DPP-4, dipeptidylpeptidase 4; SGLT-2, sodium-glucose co-transporter 2.

**Figur S3:** Annual prevalence of all glucose-lowering drug-users (a) and insulin users (b) in Denmark per 1,000 inhabitants, 1999-2014, age < 20 years.

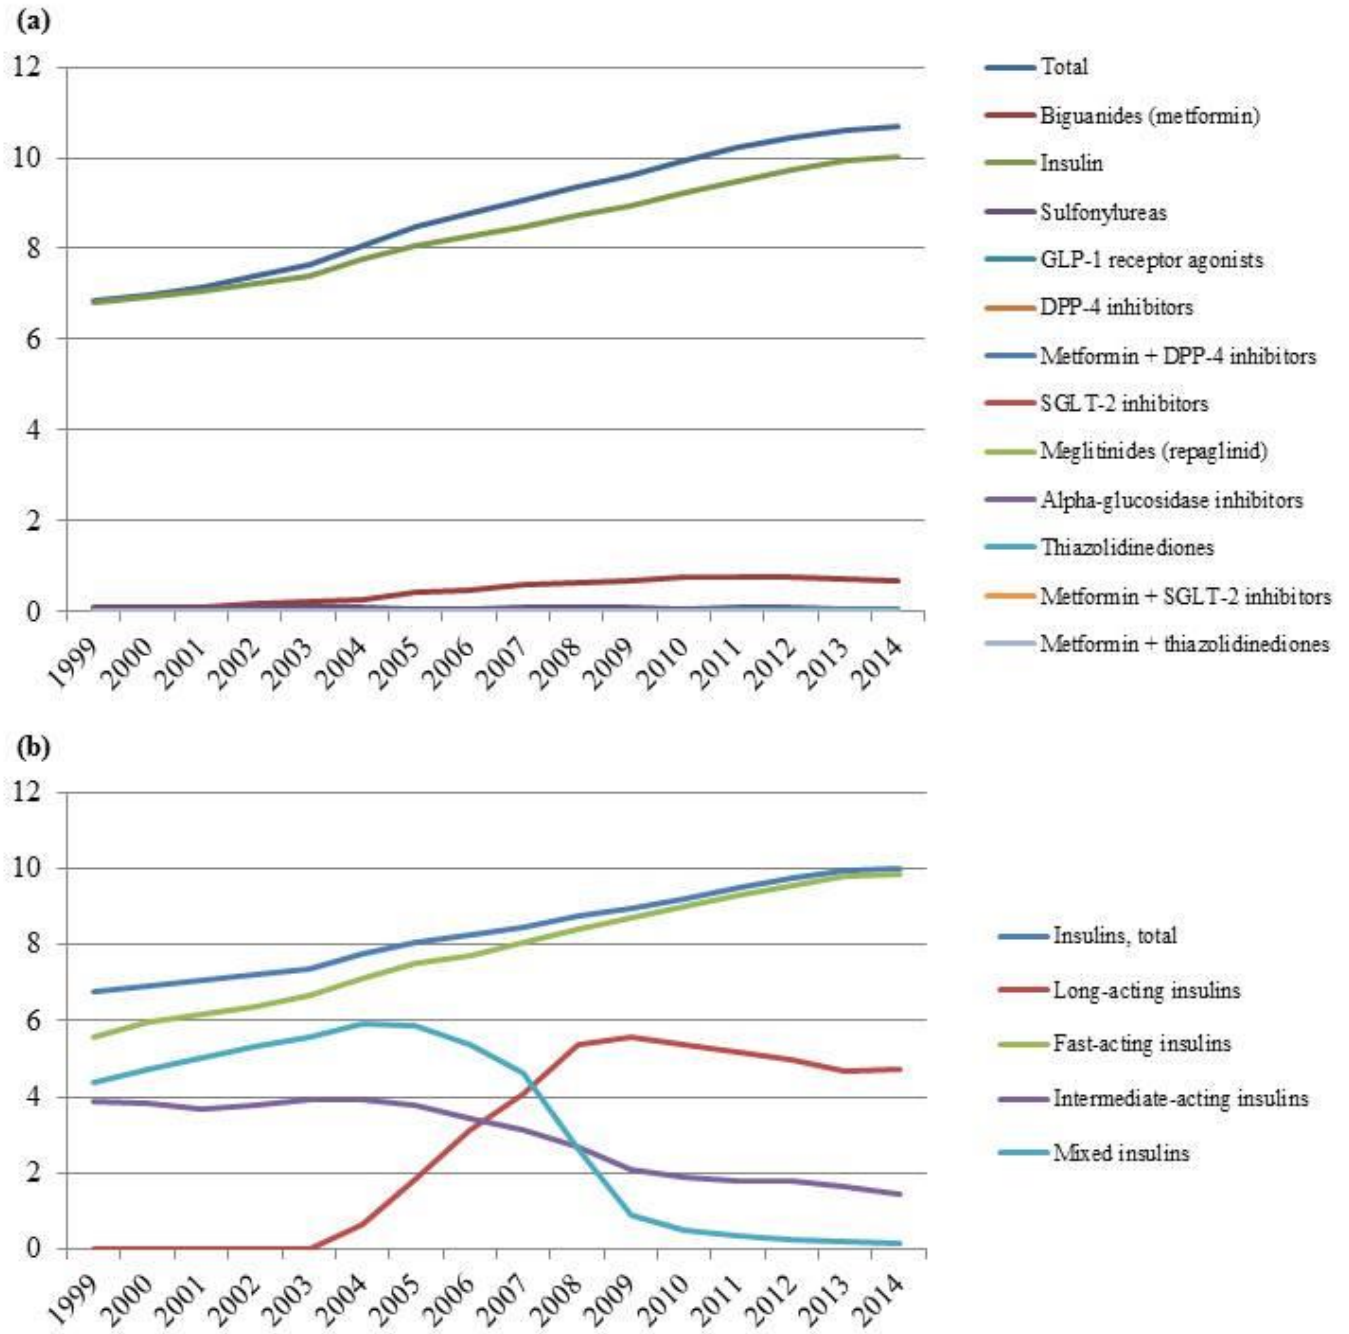

**Notes:** The number of persons prescribed different therapies in a given year is higher than the total number of glucose-lowering drug users that year due to possibility of polypharmacy and drug-shifters.

**Abbreviations:** GLP-1, glucagon-like receptor 1; DPP-4, dipeptidylpeptidase 4; SGLT-2, sodium-glucose co-transporter 2.

**Figur S4:** Annual prevalence of all glucose-lowering drug-users (a) and insulin users (b) in Denmark per 1,000 inhabitants, 1999-2014, age = 20-39 years.

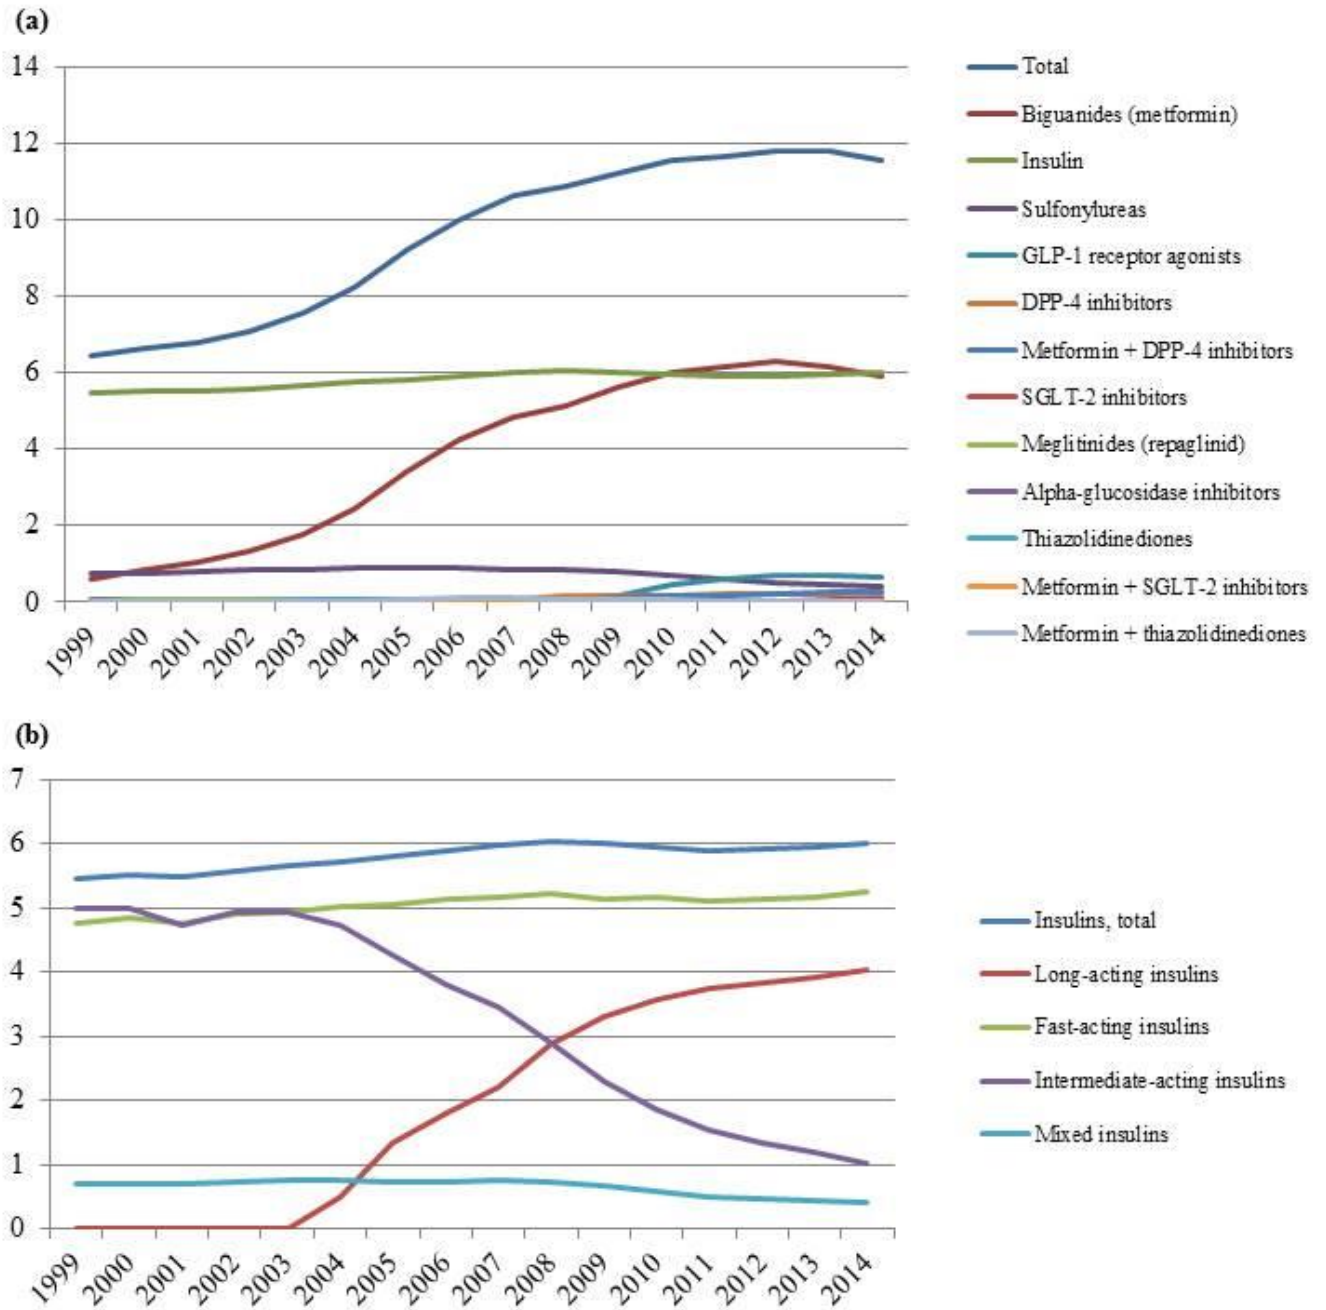

**Notes:** The number of persons prescribed different therapies in a given year is higher than the total number of glucose-lowering drug users that year due to possibility of polypharmacy and drug-shifters.

**Abbreviations:** GLP-1, glucagon-like receptor 1; DPP-4, dipeptidylpeptidase 4; SGLT-2, sodium-glucose co-transporter 2.

**Figur S5:** Annual prevalence of all glucose-lowering drug-users (a) and insulin users (b) in Denmark per 1,000 inhabitants, 1999-2014, age = 40-64 years.

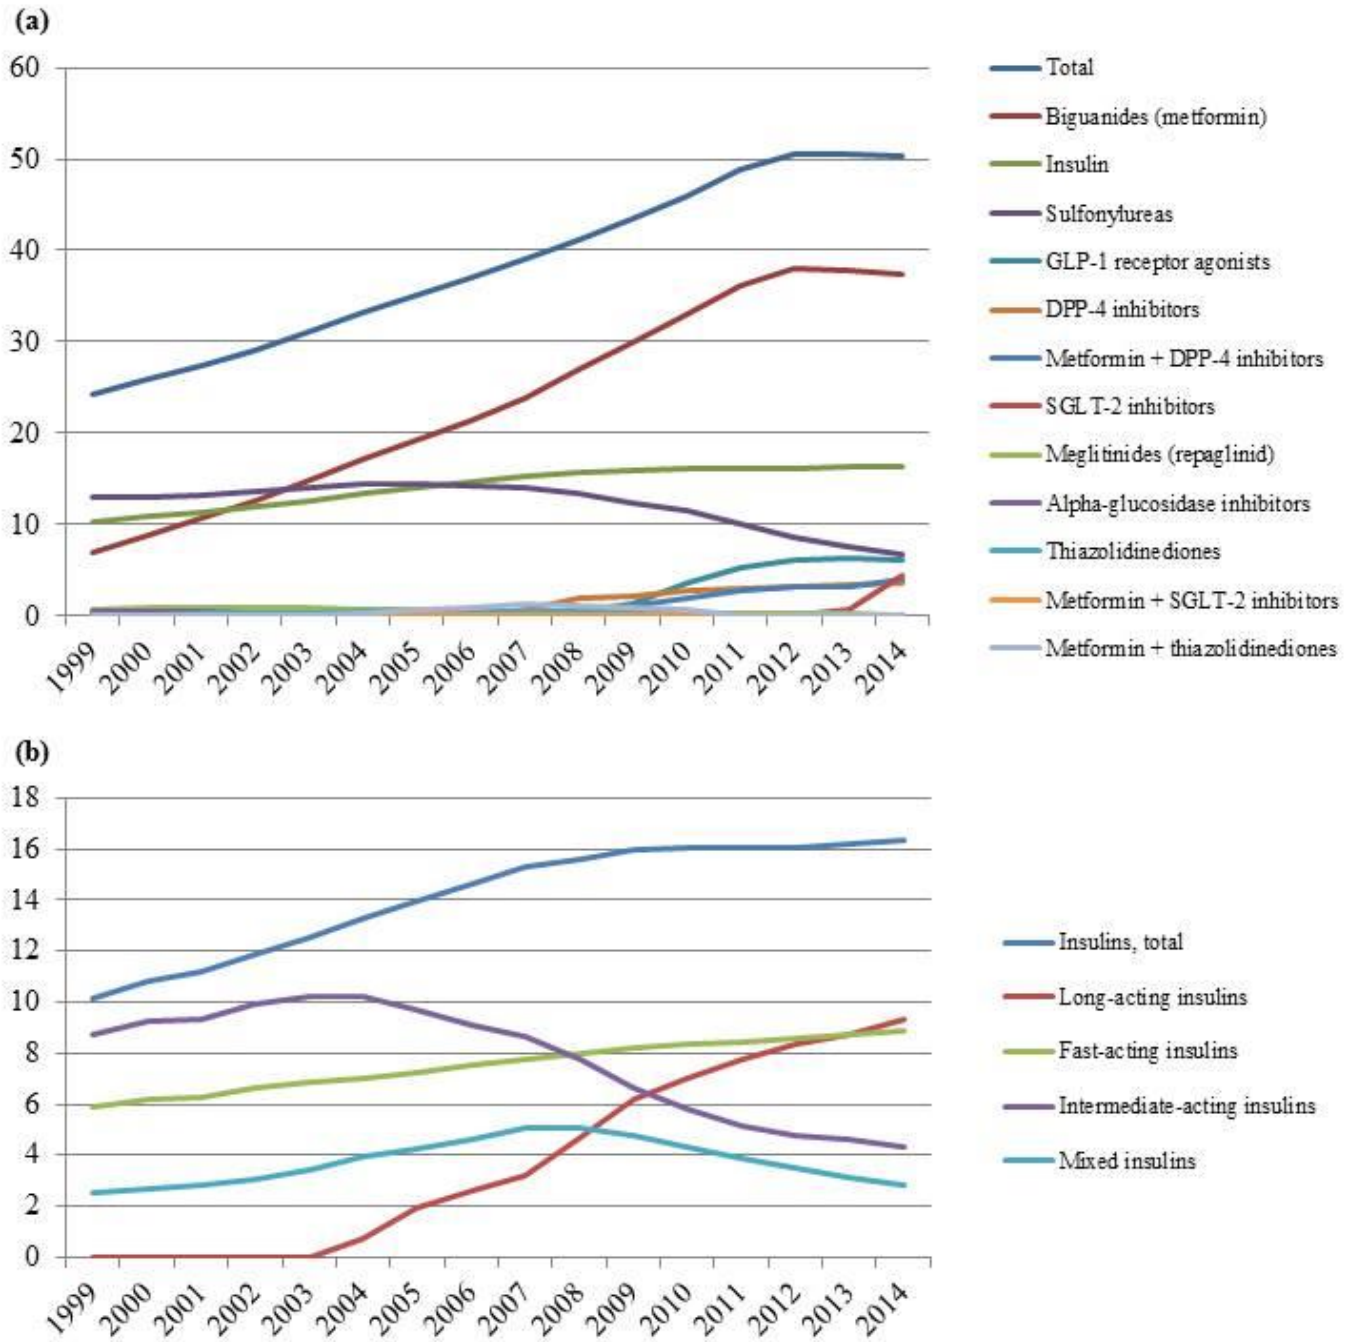

**Notes:** The number of persons prescribed different therapies in a given year is higher than the total number of glucose-lowering drug users that year due to possibility of polypharmacy and drug-shifters.

**Abbreviations:** GLP-1, glucagon-like receptor 1; DPP-4, dipeptidylpeptidase 4; SGLT-2, sodium-glucose co-transporter 2.

**Figur S6:** Annual prevalence of all glucose-lowering drug-users (a) and insulin users (b) in Denmark per 1,000 inhabitants, 1999-2014, age = 65-79 years.

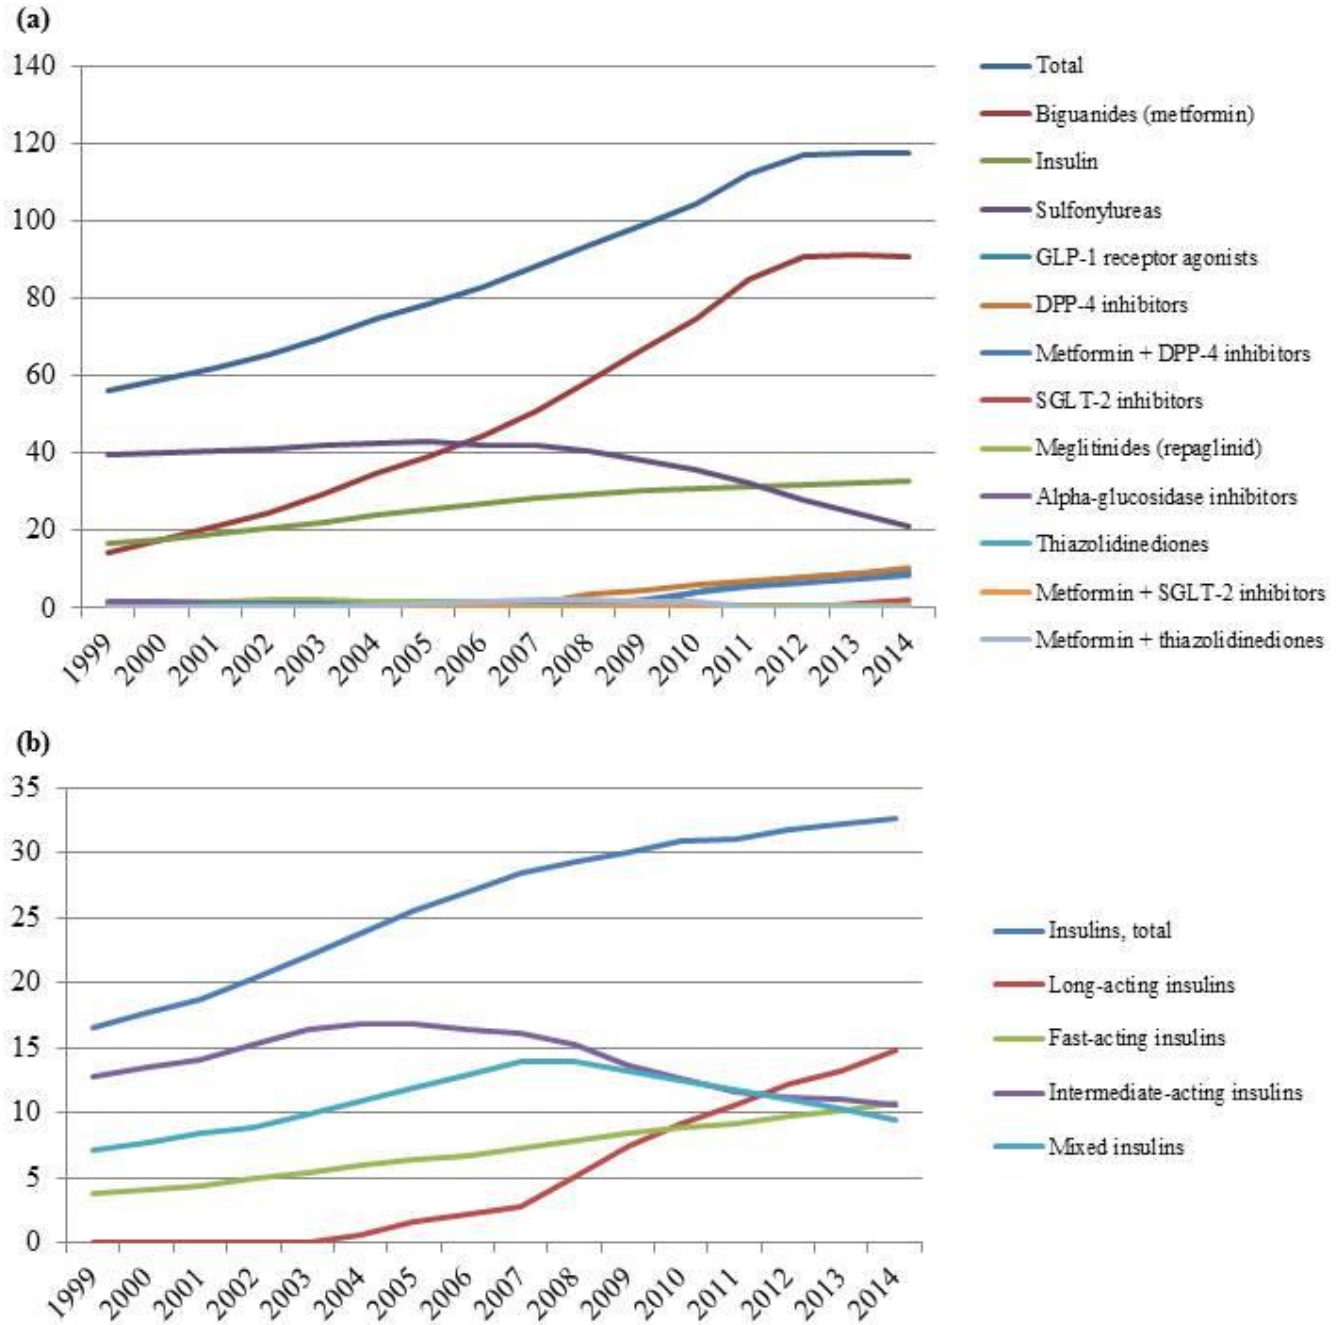

**Notes:** The number of persons prescribed different therapies in a given year is higher than the total number of glucose-lowering drug users that year due to possibility of polypharmacy and drug-shifters.

**Abbreviations:** GLP-1, glucagon-like receptor 1; DPP-4, dipeptidylpeptidase 4; SGLT-2, sodium-glucose co-transporter 2.

**Figur S7:** Annual prevalence of all glucose-lowering drug-users (a) and insulin users (b) in Denmark per 1,000 inhabitants, 1999-2014, age = ≥ 80 years.

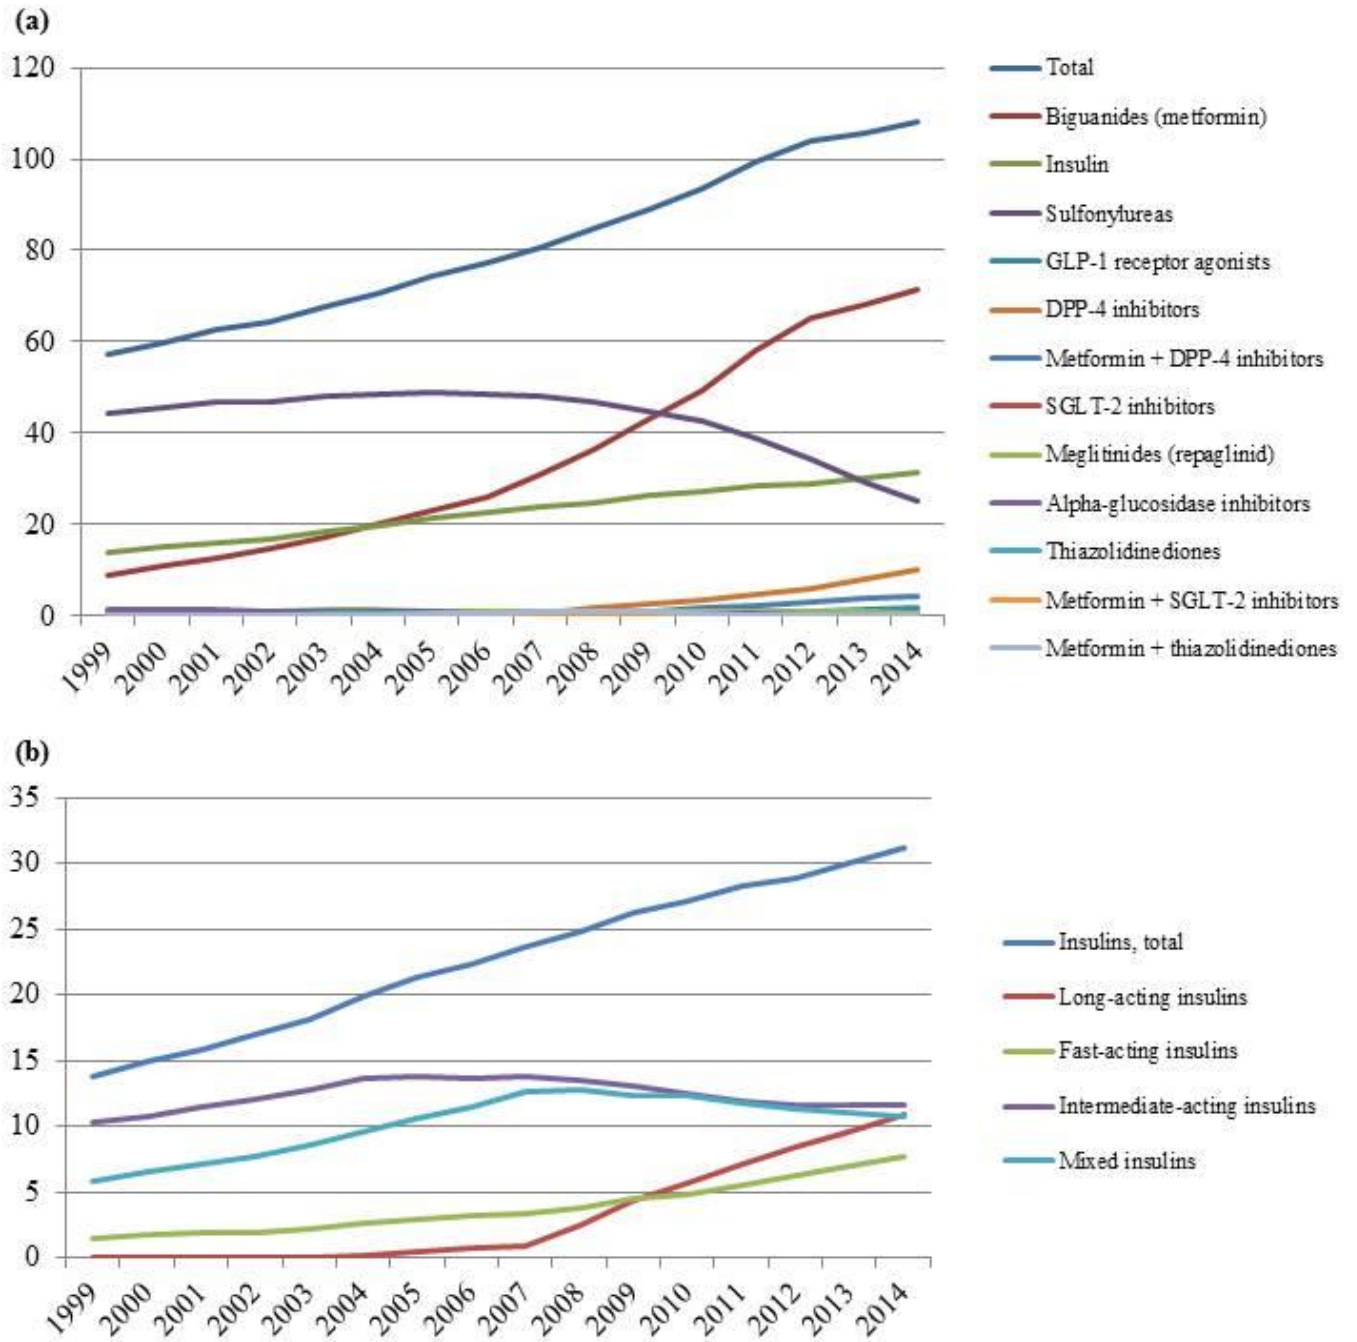

The number of persons prescribed different therapies in a given year is higher than the total number of glucose-lowering drug users that year due to possibility of polypharmacy and drug-shifters.

**Abbreviations:** GLP-1, glucagon-like receptor 1; DPP-4, dipeptidylpeptidase 4; SGLT-2, sodium-glucose co-transporter 2.
